**The purine nucleoside phosphorylase *pnp-1* regulates epithelial cell resistance to infection in *C. elegans***

**Short running title: Purine metabolism regulates epithelial immunity**

Eillen Teclé<sup>1</sup>, Crystal B. Chhan<sup>1</sup>, Latisha Franklin<sup>2</sup>, Ryan S. Underwood<sup>1</sup>, Wendy Hanna-Rose<sup>2</sup>, and Emily R. Troemel<sup>\*1</sup>

1 Division of Biological Sciences, University of California, San Diego, La Jolla, California, United States of America

2 Department of Biochemistry and Molecular Biology, The Pennsylvania State University, University Park, Pennsylvania, United States of America

\*Corresponding author

Email: [etroemel@ucsd.edu](mailto:etroemel@ucsd.edu)

## 1 **Abstract**

2 Intestinal epithelial cells are subject to attack by a diverse array of microbes, including  
3 intracellular as well as extracellular pathogens. While defense in epithelial cells can be  
4 triggered by pattern recognition receptor-mediated detection of microbe-associated  
5 molecular patterns, there is much to be learned about how they sense infection via  
6 perturbations of host physiology, which often occur during infection. A recently  
7 described host defense response in the nematode *C. elegans* called the Intracellular  
8 Pathogen Response (IPR) can be triggered by infection with diverse natural intracellular  
9 pathogens, as well as by perturbations to protein homeostasis. From a forward genetic  
10 screen, we identified the *C. elegans* ortholog of purine nucleoside phosphorylase *pnp-1*  
11 as a negative regulator of IPR gene expression, as well as a negative regulator of  
12 genes induced by extracellular pathogens. Accordingly, *pnp-1* mutants have resistance  
13 to both intracellular and extracellular pathogens. Metabolomics analysis indicates that  
14 *C. elegans pnp-1* likely has enzymatic activity similar to its human ortholog, serving to  
15 convert purine nucleosides into free bases. Classic genetic studies have shown how  
16 mutations in human purine nucleoside phosphorylase cause immunodeficiency due to  
17 T-cell dysfunction. Here we show that *C. elegans pnp-1* acts in intestinal epithelial cells  
18 to regulate defense. Altogether, these results indicate that perturbations in purine  
19 metabolism are likely monitored as a cue to promote defense against epithelial infection  
20 in the nematode *C. elegans*.

21

## 22 **Author summary**

23 All life requires purine nucleotides. However, obligate intracellular pathogens are  
24 incapable of generating their own purine nucleotides and thus have evolved strategies  
25 to steal these nucleotides from host cells in order to support their growth and replication.  
26 Using the small roundworm *C. elegans*, we show that infection with natural obligate  
27 intracellular pathogens is impaired by loss of *pnp-1*, the *C. elegans* ortholog of the  
28 vertebrate purine nucleoside phosphorylase (PNP), which is an enzyme involved in  
29 salvaging purines. Loss of *pnp-1* leads to altered levels of purine nucleotide precursors  
30 and increased expression of Intracellular Pathogen Response genes, which are induced  
31 by viral and fungal intracellular pathogens of *C. elegans*. In addition, we find that loss of

32 *pnp-1* increases resistance to extracellular pathogen infection and increases expression  
33 of genes involved in extracellular pathogen defense. Interestingly, studies from 1975  
34 found that mutations in human PNP impair T-cell immunity, whereas our findings here  
35 indicate *C. elegans pnp-1* regulates intestinal epithelial immunity. Overall, our work  
36 indicates that host purine homeostasis regulates resistance to both intracellular and  
37 extracellular pathogen infection.

38

## 39 **Introduction**

40 Obligate intracellular pathogens are completely dependent on their hosts for replication.  
41 In most cases, these pathogens lack biosynthetic pathways and thus rely on host cells  
42 to obtain building blocks for growth, including nucleotides, amino acids and lipids. In  
43 particular, viruses are completely reliant on host nucleotides for replication and  
44 transcription. As such, host restriction factors can serve to limit the pool of nucleotides  
45 available to viruses and thus block their growth. For example, the human SAM domain  
46 and HD domain-containing protein 1 is a restriction factor for Human Immunodeficiency  
47 Virus (HIV), acting to degrade the deoxynucleotides needed for reverse transcription of  
48 the HIV genome [1]. Even eukaryotic pathogens such as microsporidia appear to lack  
49 nucleotide biosynthetic pathways and instead 'steal' nucleotides from host cells [2, 3]. In  
50 particular, microsporidia express cell-surface ATP/GTP transporters, which are believed  
51 to import host purine nucleotides to support parasite growth and proliferation [4-6].

52

53 Microsporidia comprise a phylum of obligate intracellular pathogens related to fungi,  
54 with over 1400 species identified [7]. Microsporidia are extremely prevalent in nature  
55 and almost all animals are susceptible to infection by at least one microsporidia species  
56 [8, 9]. Recent work indicates that these fungal pathogens are the most common cause  
57 of infection in the wild for the model nematode *C. elegans* and other related nematodes  
58 [10, 11]. The microsporidian *Nematocida parisii* is the pathogen species most often  
59 found to infect wild *C. elegans*, and this pathogen goes through its entire replicative life  
60 cycle inside the intestine [10]. Interestingly, the host transcriptional response to *N.*  
61 *parisii* appears to be almost identical to the host response to the Orsay virus, which is a  
62 3-gene positive-sense RNA virus and another natural intracellular pathogen of the *C.*

63 *C. elegans* intestine [10, 12-14]. This common transcriptional response has been named  
64 the Intracellular Pathogen Response, or IPR, and it appears to constitute a novel  
65 defense pathway in *C. elegans* [15]. Although the host sensor for *N. parisii* is not known,  
66 we have recently discovered that *drh-1*, a *C. elegans* homolog of the mammalian RIG-I  
67 dsRNA sensor, mediates induction of the IPR likely through detecting dsRNA or other  
68 RNA replication products of the Orsay virus [16].

69  
70 Forward genetic studies identified *pals-22* and *pals-25* as antagonistic paralogs that  
71 regulate the IPR and associated phenotypes [15, 17]. *pals-22* and *pals-25* belong to the  
72 *pals* gene family in *C. elegans*, which contains at least 39 *pals* genes named for the  
73 loosely conserved ALS2CR12 protein signature located in the single ALS2CR12 gene  
74 found in each of the human and mouse genomes [15, 18, 19]. The biochemical  
75 functions of ALS2CR12 and *C. elegans pals* genes are unknown, but *pals-22* and *pals-*  
76 *25* appear to dramatically rewire *C. elegans* physiology. *pals-22* mutants have  
77 constitutive expression of IPR genes in the absence of infection, and have improved  
78 tolerance of proteotoxic stress, as well as increased resistance against *N. parisii* and  
79 the Orsay virus, but decreased resistance against the bacterial extracellular pathogen  
80 *Pseudomonas aeruginosa* [15, 17]. A mutation in *pals-25* reverses these phenotypes  
81 found in *pals-22* mutants, as *pals-22 pals-25* double mutants have phenotypes similar to  
82 wild-type animals, including wild-type levels of IPR gene expression. There are  
83 approximately 100 IPR genes, which include other *pals* genes like *pals-5* (although  
84 notably not *pals-22* and *pals-25*), as well as components of a cullin RING ubiquitin  
85 ligase complex, which is required for the increased tolerance of proteotoxic stress  
86 observed in *pals-22* mutants [17, 20].

87  
88 To gain insight into how *C. elegans* regulate IPR gene expression and related  
89 phenotypes, we sought to identify additional regulators of the IPR. Here, we report that  
90 *C. elegans pnp-1* is a novel repressor of the IPR. *pnp-1* is the *C. elegans* ortholog of the  
91 vertebrate purine nucleoside phosphorylase (PNP), which functions in the purine  
92 salvage pathway to regulate levels of purine nucleotides. Interestingly, mutations in  
93 human PNP lead to severe combined immunodeficiency disease due to T-cell

94 dysfunction [21-23]. Our results indicate that, like vertebrate PNP, *C. elegans pnp-1*  
95 functions as a purine nucleoside phosphorylase, regulating levels of purine metabolites.  
96 We find that *pnp-1* mutants, similar to *pals-22* mutants, display resistance to various  
97 natural intestinal pathogens. Surprisingly, unlike *pals-22*, *pnp-1* also negatively  
98 regulates the expression of genes that are induced by bacterial infection and by other  
99 immune regulators. Moreover, *pnp-1* mutants display resistance to the extracellular  
100 bacterial pathogen *P. aeruginosa*. Epistasis analysis indicates that the p38 MAP kinase  
101 *pmk-1* is required for the increased resistance of *pnp-1* mutants against extracellular  
102 pathogens, but *pmk-1* is not required for the increased resistance of *pnp-1* mutants  
103 against intracellular pathogens. In summary, our work indicates that *pnp-1* is a new  
104 regulator of the response to both intracellular and extracellular infection, suggesting that  
105 purine metabolite levels are important regulators of the response to pathogen infection.  
106

## 107 Results

### 108 ***pnp-1* is a negative regulator of IPR gene expression.**

109 To identify negative regulators of the IPR, we performed a forward mutagenesis screen  
110 using the established *pals-5p::GFP* transcriptional reporter, which induces GFP  
111 expression in the intestine upon *N. parisii* or Orsay virus infection. From this screen, we  
112 isolated mutants with constitutive *pals-5p::GFP* expression including the allele *jy90*.  
113 After back-crossing *jy90* mutants and mapping the mutation to Chromosome IV, we  
114 performed whole genome sequencing to identify the causative allele. From this analysis,  
115 we identified a missense mutation in the PNP gene *pnp-1*, which should result in  
116 substitution of a conserved serine (S51 or S68 in isoform a or b, respectively) to leucine  
117 (Fig 1A). This serine is conserved across phylogeny and has been shown to be required  
118 for enzymatic activity of human PNP (S1 Fig 1) [24]. To confirm that a mutation in *pnp-1*  
119 can induce *pals-5p::GFP* expression, we used CRISPR/Cas9 editing to generate a  
120 deletion allele of *pnp-1* called *jy121*. We found that *pnp-1(jy121)* mutants have  
121 constitutive *pals-5p::GFP* expression similar to *pnp-1(jy90)* mutants, confirming that  
122 *pnp-1* regulates expression of *pals-5p::GFP* (Fig 1B-1D). In order to test if *pnp-1*  
123 regulates expression of endogenous *pals-5* mRNA and not just the *pals-5p::GFP*  
124 transgene, we performed qRT-PCR and analyzed the mRNA expression of *pals-5* and

125 other IPR genes. Here, we found that *pnp-1* mutants constitutively express endogenous  
126 mRNA for *pals-5* and other IPR genes in the absence of any IPR trigger (Fig 1E),  
127 indicating that wild-type *pnp-1* negatively regulates the mRNA expression of several IPR  
128 genes.

129

### 130 ***pnp-1* mutants have altered levels of purine metabolites**

131 Vertebrate PNP functions in the purine salvage pathway where purine nucleotides  
132 sequentially are degraded to nucleosides and purine bases. These bases are then  
133 converted back into purine nucleotides. Specifically, PNP converts the nucleosides  
134 inosine or guanosine into the bases hypoxanthine or guanine, respectively (S2A Fig). If  
135 *pnp-1* were functioning in *C. elegans* as a PNP, *pnp-1* mutants should have higher  
136 levels of nucleosides, and lower levels of purine bases. To determine whether this is the  
137 case, we performed targeted Liquid Chromatography-Mass Spectrometry metabolomic  
138 analysis to quantify these metabolites in *pnp-1* mutants. Indeed, this analysis revealed  
139 that *pnp-1* mutants have significantly higher levels of inosine and significantly lower  
140 levels of hypoxanthine as compared to wild-type animals (Fig 1F). However, guanine  
141 and guanosine were below detectable levels in both mutants and wild-type animals, so  
142 comparisons could not be made for these metabolites. No significant changes were  
143 found in the levels of any other detected metabolites of the purine salvage pathway or  
144 metabolites of the *de novo* purine synthesis pathway in *pnp-1* mutants (S2 Fig). Of note,  
145 the levels of inosine and hypoxanthine in *pals-22* mutants were not significantly different  
146 than those of wild-type animals, indicating that not all mutants with constitutive IPR  
147 gene expression have altered inosine and hypoxanthine levels. In summary, these  
148 findings indicate that, similar to its vertebrate ortholog, *C. elegans pnp-1* functions as a  
149 PNP to convert purine nucleosides into free purine bases.

150

### 151 ***pnp-1* mutants have increased resistance to intracellular pathogen infection**

152 As *pnp-1* mutants have constitutive expression of IPR genes, we hypothesized that  
153 these mutants should be resistant to intracellular pathogen infection. Therefore, we  
154 assessed the pathogen load of Orsay virus and *N. parisii* in *pnp-1* mutants. Here we  
155 found that Orsay viral load, as determined by qRT-PCR for the viral genome segment

156 RNA1, is significantly lower in *pnp-1* mutants as compared to wild-type animals (Fig  
157 2A). We next analyzed *N. parisii* pathogen load at 3 hours post infection (hpi) by  
158 counting individual sporoplasms, which are individual parasite cells likely to represent  
159 individual invasion events into intestinal cells [25]. We found that *pnp-1* mutants display  
160 a significant reduction of the number of sporoplasms per animal as compared to wild-  
161 type animals (Fig 2B). We also investigated *N. parisii* pathogen load at 30 hpi, when  
162 sporoplasms have developed into replicative meronts within the intestine. At 30 hpi as  
163 well, we found that *N. parisii* pathogen load of *pnp-1* mutants is significantly lower than  
164 that of wild-type animals (Fig 2C). Of note, *pals-22* mutants have significantly higher  
165 resistance to infection than *pnp-1* mutants in these assays (Fig 2A-C).

166  
167 Consistent with *pnp-1* mutants having lower *N. parisii* pathogen load compared to wild-  
168 type animals, we also found that they have increased survival upon infection compared  
169 to wild-type animals (Fig 2D, S3 Fig). To address the concern that the pathogen  
170 resistance of *pnp-1* mutants is due to feeding defects that lower the exposure of these  
171 animals to intestinal pathogens, we fed them fluorescent beads and quantified  
172 accumulation in the intestinal lumen. We found that accumulation of these beads is not  
173 significantly different in either of the *pnp-1* mutants as compared to wild-type animals,  
174 whereas the known feeding-defective *eat-2* mutants displayed significantly less bead  
175 accumulation compared to wild-type animals (Fig 2E). Taken together, these results  
176 indicate that wild-type *pnp-1* functions to negatively regulate resistance to and survival  
177 upon intracellular pathogen infection.

178

### 179 ***pnp-1* functions in the intestine to regulate the IPR**

180 To determine the site of action for *pnp-1*-mediated regulation of the IPR, we  
181 investigated its tissue expression using a “TransgeneOme” construct containing PNP-1  
182 tagged at the C terminus with GFP and 3×FLAG, surrounded by a ~20-kb endogenous  
183 genomic regulatory region [26]. We generated transgenic animals containing this  
184 construct and observed GFP expression in the 20 epithelial cells that comprise the  
185 intestine, as well as in several head neurons (Fig 3A, S4 Fig). Importantly, expression of  
186 this PNP-1::GFP transgene rescued the decreased number of sporoplasms in *pnp-1*



187 mutants (Fig 3B), supporting the model that expression from this transgene reflects  
188 endogenous PNP-1 expression.

189

190 Next, we used single-copy tissue-specific expression to investigate where *pnp-1*  
191 regulates IPR phenotypes. In a *pnp-1* mutant background, we generated single copy  
192 insertions of *pnp-1* under the control of an intestine-specific promoter (*vha-6*) or a  
193 neuron-specific promoter (*unc-119*) into the same genomic locus. Expression of *pnp-1*  
194 in the intestine, but not in neurons, rescued the *pnp-1* mutant phenotypes of decreased  
195 number of sporoplasms (Fig 3C) and increased expression of IPR genes (Fig 3D).  
196 Altogether, these results demonstrate that *pnp-1* acts in intestinal epithelial cells to  
197 regulate IPR gene expression and pathogen resistance.

198

### 199 ***pnp-1* mutants display phenotypes not previously associated with IPR activation**

200 As *pnp-1* had not been characterized before in *C. elegans*, we next explored additional  
201 phenotypes. We focused on phenotypes found in *pals-22* mutants, as these mutants  
202 have constitutive IPR expression, like *pnp-1* mutants [15, 17]. First, we determined the  
203 lifespan of *pnp-1* mutants. In contrast to the short-lived *pals-22* mutants, we found that  
204 the lifespan of *pnp-1* mutants appears similar to wild-type animals (Fig 4A, S5 Fig).

205 Second, we investigated the thermotolerance of *pnp-1* mutants, because *pals-22*  
206 mutants display increased resistance to proteotoxic stress, including better  
207 thermotolerance compared to wild-type animals. Here, *pnp-1* mutants also had a distinct  
208 phenotype from *pals-22* mutants, as they displayed significantly decreased  
209 thermotolerance as compared to wild-type animals (Figure 4B). Interestingly, *pnp-1*  
210 appears to be acting downstream or in parallel of *pals-22* for thermotolerance, as the  
211 *pals-22;pnp-1* double mutants show decreased thermotolerance, similar to *pnp-1* single  
212 mutants (Fig 4C).

213

214 We further explored the pathogen resistance phenotypes of *pnp-1* mutants in  
215 comparison to *pals-22* mutants. Previous work had shown that *pals-22* mutants have  
216 increased susceptibility to the extracellular Gram-negative pathogen *P. aeruginosa*  
217 strain PA14 [15]. In contrast to *pals-22* mutants, we found that *pnp-1* mutants are



218 slightly but significantly resistant to PA14 infection as compared to wild-type animals  
219 (Fig 4D). Because the NSY-1/SEK-1/PMK-1 p38 MAP kinase pathway is one of the  
220 most important pathways for defense against *P. aeruginosa* in *C. elegans* [27-29], we  
221 next investigated whether *pmk-1* was required for this increased resistance of *pnp-1*  
222 mutants (Fig 4E). Here we found that *pnp-1 pmk-1* double mutants had PA14 pathogen  
223 load more similar to that of *pmk-1* single mutants, indicating that *pmk-1* is required for  
224 the enhanced resistance and likely acts downstream or in parallel to *pnp-1*. Loss of  
225 *pmk-1* in a *pals-22* mutant background further enhanced susceptibility in this  
226 background as well, suggesting that here too, *pmk-1* acts downstream of, or in parallel  
227 to, this IPR regulator with respect to extracellular pathogen resistance.

228  
229 During initial species description and characterization of *N. parisii*, we found very little  
230 role for *pmk-1* in resistance to *N. parisii* infection, as assessed by survival upon  
231 infection, and by meront and spore load quantified by Nomarski optics [10]. To analyze  
232 pathogen resistance in greater detail, here we use the more recently developed method  
233 as described above to analyze *pmk-1* resistance at 3 hpi by counting sporoplasms.  
234 From this analysis we found that *pmk-1* mutants do have significantly enhanced  
235 susceptibility to *N. parisii* infection. Interestingly, this enhanced susceptibility can be  
236 suppressed by mutations in *pnp-1* or *pals-22* (Fig 4F), indicating that in contrast to the  
237 results with *P. aeruginosa*, *pmk-1* appears to act upstream or in parallel to *pnp-1* and  
238 *pals-22* for resistance to *N. parisii*. As there is no significant overlap between IPR genes  
239 and those regulated by *pmk-1* [13, 17], *pmk-1* likely functions in parallel to *pnp-1* and  
240 *pals-22* in this infection context. These results indicate that the genetic interactions  
241 between *pmk-1* and the negative IPR regulators *pnp-1* and *pals-22* depend on the  
242 pathogen being tested.

243  
244 Overall, these results demonstrate that while *pnp-1* and *pals-22* are both negative  
245 regulators of IPR gene expression and intracellular pathogen resistance, they have  
246 distinct phenotypes with respect to thermotolerance, lifespan and extracellular pathogen  
247 resistance.

248

249 ***pnp-1* mutants have increased expression of most IPR genes**

250 Next, we sought to determine the full transcriptome changes in *pnp-1* mutants.  
251 Therefore, we performed RNA-seq analysis on both *pnp-1* mutants as well as wild-type  
252 animals. By differential gene expression analysis (S3 Table), we determined that 286  
253 and 244 genes are upregulated ( $p < 0.05$ , no fold change cut off) in *pnp-1(jy90)* and *pnp-*  
254 *1(jy121)* mutants respectively, compared to wild-type animals. We found that 226  
255 upregulated genes are common to both mutants and that this overlap is statistically  
256 significant (Fig 5A). In addition, we compared the genes upregulated in *pnp-1* and *pals-*  
257 *22* mutants and found a significant overlap between these gene sets (Fig 5B). Notably,  
258 of the 25 *pals* genes upregulated by *N. parisii* infection and Orsay virus, 22 are  
259 significantly up-regulated in both *pnp-1* mutant alleles (Fig 5C). In addition, several  
260 other genes that had previously been shown to be upregulated in the IPR are also  
261 upregulated in *pnp-1* mutants (Fig 5D).

262  
263 To more globally evaluate the similarity between genes regulated by *pnp-1* and genes  
264 regulated by previously described IPR regulators, we performed Gene Set Enrichment  
265 Analysis (GSEA) (S4 and S5 Table) [30], confirming similarity using hypergeometric  
266 testing (S6 Table). We determined that *pnp-1* significantly regulates genes that are  
267 upregulated by almost all known IPR triggers, including *N. parisii* infection, Orsay virus  
268 infection and treatment with the proteasome inhibitor bortezomib (Fig 5E). [Of note, *pnp-*  
269 *1* does not regulate the chitinase-like *chil* genes, which are induced by infection with the  
270 oomycete *Myzocytiopsis humicola*, a pathogen that can induce some, but not all IPR  
271 genes [17, 31].] Moreover, *pnp-1* regulates genes that are also induced by ectopic  
272 expression of the RNA1 segment of Orsay virus that contains an active form of RNA-  
273 dependent RNA polymerase. These induced genes include many IPR genes [16].

274  
275 ***pnp-1* negatively regulates genes involved in immunity to extracellular pathogens**

276 Gene Ontology (GO) term analysis on the genes upregulated in *pnp-1* mutants showed  
277 statistically significant enrichment of genes involved in innate immune response  
278 (GO:0045087), carbohydrate binding (GO:0030246), defense response to Gram-  
279 negative bacteria (GO:0050829) and defense to Gram-positive bacteria (GO:0050830)

280 (S7 Table) [32]. These GO terms were not previously found to be enriched in genes  
281 upregulated by *N. parisii* infection [13]. In addition, we performed a similar analysis with  
282 the Wormcat program that identifies significantly over-represented genes in a  
283 differentially expressed gene set and bins them into more refined categories than GO  
284 terms (Fig 5F, S8 Table) [33]. Wormcat analysis of *pnp-1* upregulated genes shows  
285 over-representation of genes involved in pathogen/stress response and proteasome  
286 proteolysis, which include genes that encode for proteins containing C-type lectin, CUB  
287 and F-box domains. Some of these genes, such as *skr-3*, *fbxa-158* and *fxba-75* are also  
288 upregulated in *pals-22* mutants [17]. However, many non-IPR genes that are induced by  
289 bacterial infection, such as *irg-4*, *lys-1* and *dod-23*, are upregulated in *pnp-1* mutants,  
290 but not in *pals-22* mutants [28]. This distinction may explain the contrast in resistance to  
291 bacterial pathogens between *pnp-1* and *pals-22* mutants.

292  
293 As *pnp-1* mutants display resistance to PA14 and express various genes involved in  
294 bacterial defense, we used GSEA analysis and hypergeometric testing to determine the  
295 similarity between genes regulated by *pnp-1* and those regulated in response to  
296 infection by various bacterial pathogens (Fig 5G, S4-S6 Tables). We determined that  
297 genes upregulated in *pnp-1* mutants are significantly similar to those induced by the  
298 Gram-negative pathogens *P. aeruginosa* and *Serratia marcescens*. In addition, we used  
299 GSEA analysis to investigate the similarity between gene regulated by *pnp-1* and those  
300 regulated by known immune regulators. We determined that genes regulated by *pnp-1*  
301 are significantly similar to those regulated by the transcription factors *sta-1*, *skn-1*, *hsf-1*,  
302 as well as *pmk-1* and its upstream MAP Kinase Kinase *sek-1*. Previous GSEA analysis  
303 of genes up-regulated in *pals-22* mutants and by *N. parisii* infection showed very little  
304 similarity to genes induced by these extracellular pathogens and immune regulators.  
305 Taken together, these gene expression analyses indicate that, in addition to regulating  
306 the IPR, *pnp-1* may play a broader role in regulating *C. elegans* immunity to bacterial  
307 pathogens.

308

## 309 **Discussion**

310 Here, we describe a role for purine metabolism in regulating intestinal epithelial cell  
311 defense against pathogen infection in the nematode *C. elegans* (Fig 6). Purine  
312 metabolism pathways are conserved from prokaryotes to humans and include the  
313 energy-expensive de novo synthesis pathway and the less energy-costly salvage  
314 pathway that recycles nucleotides (S2A Fig) [34]. While recent reports have implicated  
315 purine metabolism in *C. elegans* longevity and development, specific characterization of  
316 the salvage pathway has not previously been reported [35, 36]. Through a forward  
317 genetic screen, we identified the salvage enzyme *pnp-1* as a negative regulator of the  
318 IPR, a common transcriptional response to intracellular pathogens. Our analysis of *pnp-*  
319 *1* represents the first characterization of purine nucleoside phosphorylase and, more  
320 broadly, the purine salvage pathway in *C. elegans*. We found that *pnp-1* mutants are  
321 resistant to the natural intracellular pathogens *N. parisii* and the Orsay virus (Fig 2). This  
322 resistance phenotype is in common with *pals-22* mutants, which also have upregulated  
323 IPR gene expression [17]. While much remains to be defined about the regulation and  
324 outputs of IPR genes, these findings are consistent with the model that upregulation of  
325 IPR genes promotes defense against intracellular pathogens.

326  
327 IPR gene upregulation in *pals-22* mutants has been associated with several other  
328 phenotypes, including increased proteostasis characterized by increased  
329 thermotolerance [15]. This increased thermotolerance of *pals-22* mutants is completely  
330 dependent on IPR genes that encode components of a multi-subunit cullin ring ubiquitin  
331 ligase complex, including the cullin *cul-6* and the F-box proteins *fbxa-75* and *fbxa-158*  
332 [20]. These IPR genes are also upregulated in *pnp-1* mutants, but surprisingly *pnp-1*  
333 mutants have greatly decreased thermotolerance compared to wild-type animals (Fig 4).  
334 One potential explanation for this distinction is that *pnp-1* mutants may have less  
335 metabolic flexibility upon heat shock than wild-type animals. *pnp-1* mutants are  
336 defective in the purine salvage pathway, which is less energy-costly than the de novo  
337 synthesis pathway. Under normal conditions the salvage pathway is preferentially used,  
338 but in response to high purine demands such as heat shock, the de novo pathway is  
339 activated to increase purine metabolic flux [37-43]. One possibility is that *pnp-1* mutants  
340 have constitutive use of the de novo pathway, and so are unable to increase purine

341 metabolic flux upon heat shock, resulting in decreased thermotolerance. The  
342 observation that the *pnp-1* thermotolerance phenotype is epistatic to *pals-22* is  
343 consistent with this model, as there should be a requirement for appropriate purine  
344 metabolic flux upon heat shock, regardless of genetic background.

345

346 Another phenotype that is distinct between *pnp-1* and *pals-22* mutants is resistance to  
347 *P. aeruginosa*, with *pals-22* mutants susceptible and *pnp-1* mutants resistant to this  
348 extracellular bacterial pathogen (Fig 4). Transcriptomic analysis provided a likely  
349 explanation for this discrepancy, as *pnp-1* mutants have upregulated expression of  
350 many genes that are induced by bacterial infection and by previously described  
351 immunity pathways including the PMK-1 p38 MAPK pathway, whereas *pals-22* mutants  
352 do not. Consistent with the model that resistance of *pnp-1* mutants depends on *pmk-1*-  
353 induced genes, we find that *pmk-1* was required for the increased resistance of *pnp-1*  
354 mutants to *P. aeruginosa*. However, it should be noted that *pmk-1* mutations can  
355 suppress the resistance phenotypes of other mutants, such as *daf-2* mutants, which  
356 have very few *pmk-1* genes upregulated [28]. Therefore, the requirement for *pmk-1* in  
357 the resistance of *pnp-1* mutants may be unrelated to their regulation of similar genes,  
358 although that is an attractive model (Fig 6).

359

360 How does constitutive upregulation of IPR genes in both *pnp-1* and *pals-22* mutants  
361 lead to increased resistance to intracellular pathogens at early timepoints? The ubiquitin  
362 ligase components mentioned above appear to play a minor role in pathogen resistance  
363 [13, 20], indicating that there is either extensive redundancy in these components, other  
364 IPR genes are more important, or there may be a non-transcriptional component that  
365 enables resistance in these mutants. Given that the *N. parisii* parasite cells at 3 hpi are  
366 likely the result of initial invasion events, perhaps some host factor regulating intestinal  
367 cell invasion is altered in these mutants. Further analysis of individual IPR genes may  
368 yield insight into the mechanism of resistance against *N. parisii* in these mutants.

369

370 Which purine metabolites regulate the expression of IPR and other pathogen response  
371 genes in *pnp-1* mutants? Our metabolomics analysis confirmed that, as predicted, *pnp-*

372 1 mutants have increased levels of inosine, the nucleoside substrate for *pnp-1*, and  
373 decreased levels of hypoxanthine, the purine base product of *pnp-1* (Fig 1). No other  
374 metabolites were found to have altered levels in these mutants (S2 Fig). Therefore,  
375 inosine may be an activator, or hypoxanthine a repressor, of pathogen response gene  
376 expression. However, it is possible that altered levels of some other unknown  
377 metabolites in *pnp-1* mutants are regulators of the IPR, or perhaps *pnp-1* regulates the  
378 IPR in a manner independent of its enzymatic activity. Support for the model that the  
379 catalytic activity of *pnp-1* is required for its effects on the IPR comes from the *pnp-*  
380 *1(jy90)* allele, which has a conserved serine mutated to leucine. When this residue is  
381 mutated in the human ortholog it leads to an inactive enzyme, suggesting that *pnp-1*  
382 enzymatic function is key to its regulation of the IPR [24].

383

384 All life, including eukaryotes, prokaryotes and viruses, require purines as part of  
385 deoxynucleotides for DNA and ribonucleotides for RNA. Obligate intracellular pathogens  
386 as diverse as viruses and the eukaryotic pathogens *Plasmodium falciparum* and  
387 microsporidia depend on their hosts for purines, with several types of transporters  
388 identified in eukaryotic pathogens used to steal purines from hosts [4-6, 44-46].  
389 Extensive work on purine metabolism and its effects on human physiology have come  
390 from studies of so-called ‘inborn errors of metabolism’, which are often due to mutations  
391 in purine enzymes [21, 38, 47-50]. Interestingly, although mutations in enzymes of the  
392 purine de novo and salvage pathways cause of various disorders (e.g. deafness,  
393 intellectual disability, motor dysfunction, renal failure), only mutations in purine salvage  
394 enzymes result in immunodeficiency due to T-cell dysfunction [51, 52]. While the focus  
395 is on the detrimental effects of these mutations, it is interesting to speculate that there  
396 be some advantage conferred by these mutations in terms of resistance to infection,  
397 perhaps in the heterozygote state, or against certain pathogens and/or in certain cell  
398 types. While mutations in human PNP cause severe combined immunodeficiency, this  
399 phenotype appears to be due to apoptosis of T cells [53, 54]. Less has been described  
400 about the role of PNP in intestinal epithelial cells, which is the cell type where *C.*  
401 *elegans pnp-1* mutants have increased pathogen resistance. Further work on purine  
402 metabolism and how it regulates immunity may help shed light on whether sensing



403 altered levels of purine metabolites may enable hosts to monitor the effects of pathogen  
404 infection as part of surveillance immunity to induce epithelial cell defense.

405

## 406 **Methods**

### 407 ***C. elegans* strains**

408 All worm strains were maintained by standard methods [55]. Briefly, worms were grown  
409 on NGM plates seeded with *E. coli* strain OP50-1 and grown at 20°C. All mutant and  
410 transgenic strains were backcrossed a minimum of three times. See S1 Table for a list  
411 of strains used. For several experiments, synchronized L1 worms were prepared by  
412 bleaching gravid adults to isolate embryos that hatched in M9 buffer into starved,  
413 synchronized L1 worms.

414

### 415 **Forward mutagenesis screening and cloning of *pnp-1(jy90)***

416 Ethyl methane sulfonate (EMS) (Sigma) mutagenesis of *jyIs8 [pals-5p::GFP, myo-*  
417 *2p::mCherry]* animals was performed by standard procedures [56]. P0 worms were  
418 incubated with 50 mM EMS at 20°C for 4 hours with constant rotation. Using a  
419 fluorescence dissecting microscope (Zeiss Discovery V8), mutant F2 animals  
420 ectopically expressing *pals-5p::GFP* were isolated. ~26,000 haploid genomes were  
421 screened. From this screen, we identified 9 mutant alleles that result in robust ectopic  
422 GFP expression. Four mutants failed to complement the constitutive *pals-5p::GFP*  
423 expression phenotype of *pals-22* mutants, indicating that they likely have mutations in  
424 *pals-22*. The other five alleles complement each other for the *pals-5p::GFP* expression  
425 phenotype, indicating that they have mutations in 5 distinct genes. *jy90* was mapped to  
426 Linkage Group (LG) IV using visible makers contained in the strains ERT507, ERT508,  
427 and ERT509 and confirmed by linkage group mapping using SNP primers [57]. DNA  
428 was prepared using Puregene Core kit (QIAGEN) for whole genome sequencing and  
429 submitted to Beijing Genomics Institute for sequencing with a 100 bp paired-end  
430 Illumina HiSeq 4000 with 30X coverage. Analysis identified one gene (*pnp-1*) on LG IV  
431 that harbored a variant predicted to alter gene function. *pnp-1(jy90)* contains a G to A  
432 substitution that should convert serine to leucine in isoform A and serine 68 to leucine in  
433 isoform B.



434

### 435 **CRISPR/Cas9-mediated gene deletion of *pnp-1***

436 A co-CRISPR protocol was used to generate a complete deletion of *pnp-1* [58]. Two  
437 CRISPR RNAs (crRNA) were designed to target the 5' end  
438 (TGATTCATTGGCTTCCACG) and 3' end (AGTTTTTCTGTGAACCACG) of the  
439 gene. A crRNA against *dpy-10* was used as a control. All three crRNAs and tracrRNA  
440 were synthesized by Integrated DNA Technologies (IDT) and resuspended in IDT  
441 nuclease-free duplex buffer to 100  $\mu$ M. An injection mix was made by first annealing 0.5  
442  $\mu$ l of three crRNAs with 2.5  $\mu$ l tracrRNA, then complexing the annealed sgRNA with  
443 purified 3.5  $\mu$ l of 40  $\mu$ M Cas9 protein. This mix was injected into the gonads of *jyIs8*  
444 worms. Dumpy (Dpy) and/or GFP-positive F1 animals were selected and genotyped for  
445 deletions of the *pnp-1* locus. After submitting to Sanger sequencing to confirm the  
446 presence of a complete deletion, one strain was selected and named allele *jy121*. *jy121*  
447 was backcrossed to *jyIs8* three times and then outcrossed to N2.

448

### 449 **Generation of transgenic strains**

450 For the transgenic expression reporter of *PNP-1* protein:

451 The *pnp-1* TransgeneOme fosmid

452 (K02D7.1[20219]::S0001\_pR6K\_Amp\_2xTY1ce\_EGFP\_FRT\_rpsl\_neo\_FRT\_3xFlag)dF  
453 RT::unc-119-Nat) was injected into EG6699 at 100 ng/ $\mu$ l to generate strain ERT879.

454

455 For fosmid rescue of the *pnp-1(jy90)* mutant phenotype:

456 The following injection mix was made and injected into *pnp-1(jy90)* mutants to generate  
457 strain ERT869: *myo-2p::mCherry* (10 ng/ $\mu$ l), *pnp-1* transgeneOme fosmid (25 ng/ $\mu$ l),  
458 genomic N2 DNA (65 ng/ $\mu$ l).

459

460 For single-copy tissue-specific *pnp-1* rescue strains:

461 CRISPR/Cas9 genome editing was used to insert tissue-specific expression cassettes  
462 at cxTi10882 on Chromosome IV as previously described, in a so-called “Cas-SCI  
463 (Single-Copy Insertion) technique” [59]. Briefly, we generated plasmids pET721 (*vha-*  
464 *6::pnp-1::3XFLAG::GFP::unc-54*) and pET720 (*unc-119::pnp-1::3XFLAG::unc-54*) by

465 assembling the tissue-specific cassettes (including *unc-54* 3' UTR) into plasmid  
466 pCZGY2729 such that the tissue-specific cassettes and the hygromycin resistance gene  
467 were flanked by homology arms to cxTi10882. These plasmids (25 ng/μl) were then  
468 injected into N2 animals along with pCZGY2750 that expresses Cas9 and sgRNA for  
469 cxTi10882. pCFJ10 *myo-3p::mCherry* (5 ng/μl) and pCFJ90 *myo-2p::mCherry* (2 ng/μl)  
470 were used as co-injection markers. Genomic insertion was determined by identifying  
471 animals resistant to hygromycin that did not express the co-injection markers. Single-  
472 copy insertion lines were verified by genotyping.

473

#### 474 **RNA extraction and qRT-PCR**

475 RNA was extracted using TRI reagent and 1-Bromo-3-chloropropane (Molecular  
476 Research Center, Inc.), according to the manufacturer's instructions, and converted to  
477 cDNA using the iScript (Bio-Rad) cDNA synthesis kit. qRT-PCR was performed using iQ  
478 SYBR green supermix (Bio-Rad) and various gene specific primers (S1 Table) on a  
479 BioRad CFX Connect real-time system. Each biological replicate was performed in  
480 duplicate and normalized to *nhr-23* or *snb-1*, control genes that did not change  
481 expression in these experiments. Three experimental replicates were performed.

482

#### 483 **Thermotolerance Assays**

484 Gravid adults were picked to NGM plates and grown at 20°C. L4 progeny from these  
485 adults were picked to fresh NGM plates and submitted to a heat shock of 37°C for two  
486 hours. Animals were allowed to recover for 30 minutes at room temperature, then  
487 incubated at 20°C for 24 hours, and then scored for survival. During both the heat shock  
488 and recovery, plates were placed in a single layer (plates were not stacked on top of  
489 each other). Worms were defined as dead by lack of movement on the plate, lack of  
490 pharyngeal pumping and lack of response to touch. For each replicate, three plates  
491 containing 30 worms were scored per genotype. Three experimental replicates were  
492 performed.

493

#### 494 **Targeted Metabolomics**

495 Synchronized L1 worms were plated on NGM plates seeded with OP50-1 and grown to  
496 Day 1 adult stage at 20°C. Fifteen 6 cm plates were used for each genotype per  
497 experiment and 6 experiments were performed. Metabolite extraction and LC-MS were  
498 performed with the Penn State Metabolomics Core facility as previously described [60].  
499 Raw Data were processed with MS-DIAL and metabolite levels were corrected to  
500 chlorpropamide, an internal standard. Selected metabolites were identified by m/z and  
501 column retention time values of known standards. Normalized area under the curve for  
502 each metabolite is represented as arbitrary units in graphs.

503

#### 504 ***N. parisii* infection**

505 *N. parisii* spores were isolated as previously described [25]. 1200 synchronized L1  
506 worms were mixed with  $5 \times 10^6$  *N. parisii* spores, 25  $\mu$ l 10X concentrated OP50-1  
507 bacteria and M9 to bring the total volume to 300  $\mu$ l. This mixture was then plated on  
508 room temperature unseeded 6 cm NGM plates, allowed to dry and then incubated at  
509 25°C for 3 or 30 hours. Three plates were used per genotype. Animals were fixed in 4%  
510 paraformaldehyde and then stained using a FISH probe specific to *N. parisii* ribosomal  
511 RNA conjugated to Cal Fluor 610 dye (Biosearch Technologies). For the 3 hpi timepoint,  
512 pathogen load was determined by counting sporoplasms per worms using 40x objective  
513 on a Zeiss Axiolmager M1 microscope. For each replicate, 75 animals per genotype  
514 were quantified. Three experimental replicates were performed. For the 30 hpi  
515 timepoint, pathogen load was quantified using the COPAS Biosort machine (Union  
516 Biometrica). The *N. parisii* FISH signal for each worm was normalized to the length of  
517 the worm using time-of-flight measurements. For each replicate, 100 animals per  
518 genotype were quantified.

519

#### 520 **Bead Feeding assay**

521 1200 synchronized L1 worms were mixed with 6  $\mu$ l fluorescent beads (Fluoresbrite  
522 Polychromatic Red Microspheres, Polysciences Inc.). 25  $\mu$ l 10X concentrated OP50-1  
523 bacteria and M9 to bring the total volume to 300  $\mu$ l. This mixture was then plated on  
524 room temperature unseeded 6 cm plates, allowed to dry and then incubated at 25°C for  
525 5 mins. Plates were immediately shifted to ice, washed with ice cold PBS-Tween and

526 fixed in 4% paraformaldehyde. Worms were imaged with the 4x objective on an  
527 ImageXpress Nano plate reader. Using FIJI software, the integrated density of bead  
528 fluorescence per worm was quantified from which background fluorescence was  
529 subtracted giving the Corrected Total Fluorescence (CTF) for each worm. For each  
530 replicate, 50 animals per genotype were quantified. Three experimental replicates were  
531 performed.

532

### 533 ***P. aeruginosa* infection**

534 Slow Killing (SK) plates with 50 µg/ml ampicillin were seeded with overnight cultures of  
535 PA14-dsRED [61], and then incubated at 37°C for 24 hours followed by a 24 hour  
536 incubation at 25°C. 3000 synchronized L1 worms were plated onto NGM plates seeded  
537 with OP50 and allowed to grow to L4 at 20°C. L4 worms were washed with M9,  
538 transferred to the PA14 dsRED SK plates and incubated at 25°C for 16 hours. Worms  
539 were then washed with M9 and PA14-dsRED fluorescence per animal was quantified  
540 using the COPAS Biosort machine (Union Biometrica). For each replicate, 100 animals  
541 per genotype were quantified. Three experimental replicates were performed.

542

### 543 **Orsay virus infection**

544 Orsay virus filtrates were prepared as previously described [13]. To prepare worms for  
545 infection, ~2,000 synchronized L1 worms were plated onto five 10 cm NGM plates  
546 containing a lawn of OP50-1. Plates were incubated at 20°C for 2 days until the L4  
547 stage. To prepare viral plates, 10 µl of the Orsay virus filtrate was mixed with 300 µl of a  
548 10X concentration of OP50-1 and 190 µl M9 buffer, and then this mixture was plated  
549 onto 6-cm NGM plates and dried at room temperature. The L4 worms were washed off  
550 the 10 cm NGM plates and 500 worms were added to each of the Orsay containing  
551 plates and incubated at 20°C for 24 h. RNA was extracted isolated using Tri-reagent  
552 (Molecular Research Center, Inc and converted to cDNA with iScript (Bio-Rad) cDNA  
553 synthesis kit. qRT-PCR was performed using iQ SYBR green supermix (Bio-Rad) and  
554 primers specific to RNA1 of Orsay virus. All gene expression was normalized to *snb-1*  
555 expression, which does not change upon conditions tested. Four experimental  
556 replicates were performed.

557

## 558 **Survival and Lifespan Assays**

559 For lifespan assays, ~50 synchronized L1 worms/plate per strain were plated onto six  
560 3.5 cm tissue culture-treated NGM plates seeded with OP50-1. Plates were incubated  
561 at 25°C. After 66 hours, 30 adults per strain were scored in triplicate and live animals  
562 were transferred to fresh plates. Plates were incubated at 25°C and live worms were  
563 transferred every 24 h until death or until progeny production stopped. Survival was  
564 measured every 24 h and worms that did not respond to touch were scored as dead.  
565 Animals that died from internal hatching or crawled off the plate were censored. Three  
566 experimental replicates were performed. Survival assays were performed in the same  
567 manner as lifespan assays with the addition of an initial *N. parisii* infection. For infection,  
568 ~100 synchronized L1 worms were plated with a mixture of 50 µl of a 10X concentration  
569 of OP50-1 *E. coli* and  $5 \times 10^4$  *N. parisii* spores onto a 3.5 cm tissue culture-treated NGM  
570 plate. Number of spores added was determined by finding the dosage that resulted in  
571 approximately 50% killing rate in wild-type worms after 100 hours. Four experimental  
572 replicates were performed.

573

## 574 **RNA-seq sample preparation and sequencing**

575 ~3,000 synchronized L1 worms/plate per strain were plated onto a 10 cm NGM plate  
576 seeded with OP50-1 and allowed to grow for 56 hours at 20°C. As *pnp-1* mutants grow  
577 slightly slower, wild-type L1 worms were plated 1 hour after *pnp-1(jy90)* and *pnp-*  
578 *1(jy121)* so they were synchronized in age at harvest time. RNA was extracted using  
579 TRI reagent and BCP (Molecular Research Center, Inc.) according to the  
580 manufacturer's instructions and additionally purified using the RNeasy cleanup kit with  
581 gDNA Eliminator spin columns (Qiagen). RNA quality was assessed using a  
582 TapeStation system. Sequencing libraries were constructed using TruSeq stranded  
583 mRNA method and sequenced using run type PE100 on an Illumina NovaSeq6000  
584 sequencer (Illumina). RNA quality assessment and RNA-seq were conducted at the  
585 IGM Genomics Center, University of California, San Diego, La Jolla, CA.

586

## 587 **RNA-seq and Functional Expression analysis**

588 In Rstudio, sequencing reads for *pnp-1(jy90)*, *pnp-1(jy121)* and N2 were aligned to the  
589 Wormbase WS235 release using Rsubreads and quantified using Featurecounts. Using  
590 the Galaxy web platform and the public server at usegalaxy.org, differential gene  
591 expression analysis was performed using limma-voom in which undetected and lowly  
592 expressed genes (CPM of less than one) were filtered out. An adjusted p-value of 0.05  
593 and no fold-change cutoff was used to define differentially expressed genes. This gene  
594 set was used for GO term enrichment analysis (Galaxy) [62] and Wormcat analysis  
595 (wormcat.com) [33].

596  
597 Gene Set Enrichment Analysis v3.0 software was used for functional analysis [30].  
598 Normalized RNA-sequence expression data was converted into a GSEA compatible  
599 filetype and used for analysis. The gene sets for comparison were made in Excel and  
600 then converted into a GSEA compatible file type. Independent GSEA analysis was  
601 performed for *pnp-1(jy90)* vs N2 and *pnp-1(jy121)* vs N2 gene sets. For both analyses,  
602 a signal-to-noise metric with 1000 permutations was used. Heatmaps for the NES  
603 results were made using Morpheus (<https://software.broadinstitute.org/morpheus/>).  
604 Gene sets that showed significant similarity to *pnp-1(jy90)* and *pnp-1(jy121)*  
605 differentially expressed genes were submitted to a hypergeometric test (nemates.org).  
606 Representation factors and their p-values for the overlap of *pnp-1(jy90)* or *pnp-1(jy121)*  
607 and individual gene sets were calculated using the size of the RNA-seq data set after  
608 filtering [11539 for *pnp-1(jy90)* and 11537 for *pnp-1(jy121)*].

## 609 610 **Statistics**

611 For all data:

612 Statistical analysis was performed in Prism 8. Means with error bars as standard  
613 deviation are presented unless otherwise noted. For sporoplasm experiments, the box  
614 represents the 50% of the data closest to the median and the whiskers span the values  
615 outside the box. For metabolite experiments, error bars represent the standard error of  
616 the means. Statistical significance indicated as follows: ns indicates not significant, \*  
617 indicates  $p < 0.05$ , \*\* indicates  $p < 0.01$ , \*\*\* indicates  $p < 0.001$ , \*\*\*\* indicates  $p <$   
618  $0.0001$

619

620 For lifespan and survival assays:

621 The survival of each mutant population was compared to that of the wild-type population  
622 in Prism 8 with the Log-rank (Mantel-Cox) test. A  $p$ -value  $< 0.05$  was considered  
623 significantly different from control.

624

625 For qPCR assays:

626 Unpaired, one-tailed student t-test was used.

627

628 For all pathogen load and thermotolerance assays:

629 For comparisons between three or more genotypes, means of pathogen loads for three  
630 biological replicates were compared using One-way ANOVA test with the Bonferroni  
631 correction. For comparisons between two genotypes, means of pathogen loads for three  
632 biological replicates were compared using a two-tailed t-test. A  $p$ -value  $< 0.05$  was  
633 considered significantly different.

634

635 For RNA-seq and Functional Expression analysis:

636 For GSEA, a  $p$ -value  $< 0.05$  or FDR  $< 0.25$  was considered significantly similar. For the  
637 hypergeometric test, a  $p$ -value  $< 0.05$  was considered significantly similar.

638

### 639 **Imaging**

640 Worms were anesthetized with 10 mM sodium azide and mounted on 2% agarose pads  
641 for analysis on a Zeiss Axioimager Z1 compound microscope.

642

### 643 **Acknowledgements**

644 We thank Spencer Gang and Vladimir Lazetic for helpful feedback on the manuscript.

645 We thank Jessica Sowa for preparing the viral filtrate, and Yishi Jin and Matt Andrusiak  
646 for reagents and help with the CRISPR/Cas9-mediated single-copy insertion “Cas-SCI”  
647 technique. This work was supported by NIH under R01 AG052622 and GM114139 to  
648 ERT, and by NIGMS/NIH award K12GM068524 to ET. This publication includes data  
649 generated at the UC San Diego IGM Genomics Center utilizing an Illumina NovaSeq



650 6000 that was purchased with funding from a National Institutes of Health SIG grant  
651 (#S10 OD026929). Some strains were provided by the CGC, which is funded by NIH  
652 Office of Research Infrastructure Programs (P40 OD010440).

653

654

## 655 **References**

- 656 1. Pan X, Baldauf HM, Keppler OT, Fackler OT. Restrictions to HIV-1 replication in  
657 resting CD4+ T lymphocytes. *Cell Res.* 2013;23(7):876-85.
- 658 2. Dean P, Hirt RP, Embley TM. Microsporidia: Why Make Nucleotides if You Can  
659 Steal Them? *PLoS Pathog.* 2016;12(11):e1005870.
- 660 3. Cuomo CA, Desjardins CA, Bakowski MA, Goldberg J, Ma AT, Becnel JJ, et al.  
661 Microsporidian genome analysis reveals evolutionary strategies for obligate  
662 intracellular growth. *Genome Res.* 2012;22(12):2478-88.
- 663 4. Major P, Sendra KM, Dean P, Williams TA, Watson AK, Thwaites DT, et al. A new  
664 family of cell surface located purine transporters in Microsporidia and related fungal  
665 endoparasites. *Elife.* 2019;8.
- 666 5. Heinz E, Hacker C, Dean P, Mifsud J, Goldberg AV, Williams TA, et al. Plasma  
667 membrane-located purine nucleotide transport proteins are key components for host  
668 exploitation by microsporidian intracellular parasites. *PLoS Pathog.*  
669 2014;10(12):e1004547.
- 670 6. Tsaousis AD, Kunji ER, Goldberg AV, Lucocq JM, Hirt RP, Embley TM. A novel  
671 route for ATP acquisition by the remnant mitochondria of *Encephalitozoon cuniculi*.  
672 *Nature.* 2008;453(7194):553-6.
- 673 7. Han B, Weiss LM. Microsporidia: Obligate Intracellular Pathogens within the Fungal  
674 Kingdom. . *Microbiology Spectrum.* 2017.
- 675 8. Stentiford GD, Becnel J, Weiss LM, Keeling PJ, Didier ES, Williams BP, et al.  
676 Microsporidia - Emergent Pathogens in the Global Food Chain. *Trends Parasitol.*  
677 2016;32(4):336-48.
- 678 9. Weber R, Bryan RT, Schwartz DA, Owen RL. Human microsporidial infections. *Clin*  
679 *Microbiol Rev.* 1994;7(4):426-61.
- 680 10. Troemel ER, Felix MA, Whiteman NK, Barriere A, Ausubel FM. Microsporidia are  
681 natural intracellular parasites of the nematode *Caenorhabditis elegans*. *PLoS Biol.*  
682 2008;6(12):2736-52.
- 683 11. Zhang G, Sachse M, Prevost MC, Luallen RJ, Troemel ER, Felix MA. A Large  
684 Collection of Novel Nematode-Infecting Microsporidia and Their Diverse Interactions  
685 with *Caenorhabditis elegans* and Other Related Nematodes. *PLoS Pathog.*  
686 2016;12(12):e1006093.
- 687 12. Troemel ER. Host-Microsporidia Interactions in *Caenorhabditis elegans*, a Model  
688 Nematode Host. *Microbiol Spectr.* 2016;4(5).
- 689 13. Bakowski MA, Desjardins CA, Smelkinson MG, Dunbar TL, Lopez-Moyado IF, Rifkin  
690 SA, et al. Ubiquitin-mediated response to microsporidia and virus infection in *C.*  
691 *elegans*. *PLoS Pathog.* 2014;10(6):e1004200.

- 692 14. Felix MA, Ashe A, Piffaretti J, Wu G, Nuez I, Belicard T, et al. Natural and  
693 experimental infection of *Caenorhabditis* nematodes by novel viruses related to  
694 nodaviruses. *PLoS Biol.* 2011;9(1):e1000586.
- 695 15. Reddy KC, Dror T, Sowa JN, Panek J, Chen K, Lim ES, et al. An Intracellular  
696 Pathogen Response Pathway Promotes Proteostasis in *C. elegans*. *Curr Biol.*  
697 2017;27(22):3544-53 e5.
- 698 16. Sowa JN, Jiang H, Somasundaram L, Tecle E, Xu G, Wang D, et al. The *C. elegans*  
699 RIG-I homolog DRH-1 mediates the Intracellular Pathogen Response upon viral  
700 infection. *J Virol.* 2019.
- 701 17. Reddy KC, Dror T, Underwood RS, Osman GA, Elder CR, Desjardins CA, et al.  
702 Antagonistic paralogs control a switch between growth and pathogen resistance in  
703 *C. elegans*. *PLoS Pathog.* 2019;15(1):e1007528.
- 704 18. Leyva-Diaz E, Stefanakis N, Carrera I, Glenwinkel L, Wang G, Driscoll M, et al.  
705 Silencing of Repetitive DNA Is Controlled by a Member of an Unusual  
706 *Caenorhabditis elegans* Gene Family. *Genetics.* 2017;207(2):529-45.
- 707 19. Hentati A, Bejaoui K, Pericak-Vance MA, Hentati F, Speer MC, Hung WY, et al.  
708 Linkage of recessive familial amyotrophic lateral sclerosis to chromosome 2q33-q35.  
709 *Nat Genet.* 1994;7(3):425-8.
- 710 20. Panek J, Gang SS, Reddy KC, Luallen RJ, Fulzele A, Bennett EJ, et al. A cullin-  
711 RING ubiquitin ligase promotes thermotolerance as part of the intracellular pathogen  
712 response in *Caenorhabditis elegans*. *Proc Natl Acad Sci U S A.* 2020;117(14):7950-  
713 60.
- 714 21. Fox IH. Metabolic basis for disorders of purine nucleotide degradation. *Metabolism:*  
715 *clinical and experimental.* 1981;30(6):616-34.
- 716 22. Fekrvand S, Yazdani R, Abolhassani H, Ghaffari J, Aghamohammadi A. The First  
717 Purine Nucleoside Phosphorylase Deficiency Patient Resembling IgA Deficiency and  
718 a Review of the Literature. *Immunological investigations.* 2019;48(4):410-30.
- 719 23. Giblett ER, Ammann AJ, Wara DW, Sandman R, Diamond LK. Nucleoside-  
720 phosphorylase deficiency in a child with severely defective T-cell immunity and  
721 normal B-cell immunity. *Lancet.* 1975;1(7914):1010-3.
- 722 24. Erion MD, Takabayashi K, Smith HB, Kessi J, Wagner S, Honger S, et al. Purine  
723 nucleoside phosphorylase. 1. Structure-function studies. *Biochemistry.*  
724 1997;36(39):11725-34.
- 725 25. Balla KM, Andersen EC, Kruglyak L, Troemel ER. A wild *C. elegans* strain has  
726 enhanced epithelial immunity to a natural microsporidian parasite. *PLoS Pathog.*  
727 2015;11(2):e1004583.
- 728 26. Sarov M, Murray JI, Schanze K, Pozniakovski A, Niu W, Angermann K, et al. A  
729 genome-scale resource for in vivo tag-based protein function exploration in *C.*  
730 *elegans*. *Cell.* 2012;150(4):855-66.
- 731 27. Kim DH, Feinbaum R, Alloing G, Emerson FE, Garsin DA, Inoue H, et al. A  
732 conserved p38 MAP kinase pathway in *Caenorhabditis elegans* innate immunity.  
733 *Science.* 2002;297(5581):623-6.
- 734 28. Troemel ER, Chu SW, Reinke V, Lee SS, Ausubel FM, Kim DH. p38 MAPK  
735 regulates expression of immune response genes and contributes to longevity in *C.*  
736 *elegans*. *PLoS Genet.* 2006;2(11):e183.

- 737 29. Shivers RP, Pagano DJ, Kooistra T, Richardson CE, Reddy KC, Whitney JK, et al.  
738 Phosphorylation of the conserved transcription factor ATF-7 by PMK-1 p38 MAPK  
739 regulates innate immunity in *Caenorhabditis elegans*. *PLoS Genet*.  
740 2010;6(4):e1000892.
- 741 30. Subramanian A, Tamayo P, Mootha VK, Mukherjee S, Ebert BL, Gillette MA, et al.  
742 Gene set enrichment analysis: a knowledge-based approach for interpreting  
743 genome-wide expression profiles. *Proc Natl Acad Sci U S A*. 2005;102(43):15545-  
744 50.
- 745 31. Osman GA, Fasseas MK, Koneru SL, Essmann CL, Kyrou K, Srinivasan MA, et al.  
746 Natural Infection of *C. elegans* by an Oomycete Reveals a New Pathogen-Specific  
747 Immune Response. *Curr Biol*. 2018;28(4):640-8 e5.
- 748 32. Huang da W, Sherman BT, Lempicki RA. Bioinformatics enrichment tools: paths  
749 toward the comprehensive functional analysis of large gene lists. *Nucleic Acids Res*.  
750 2009;37(1):1-13.
- 751 33. Holdorf AD, Higgins DP, Hart AC, Boag PR, Pazour GJ, Walhout AJM, et al.  
752 WormCat: An Online Tool for Annotation and Visualization of *Caenorhabditis*  
753 *elegans* Genome-Scale Data. *Genetics*. 2020;214(2):279-94.
- 754 34. Chua SM, Fraser JA. Surveying purine biosynthesis across the domains of life  
755 unveils promising drug targets in pathogens. *Immunology and cell biology*.  
756 2020;98(10):819-31.
- 757 35. Gao AW, Smith RL, van Weeghel M, Kamble R, Janssens GE, Houtkooper RH.  
758 Identification of key pathways and metabolic fingerprints of longevity in *C. elegans*.  
759 *Exp Gerontol*. 2018;113:128-40.
- 760 36. Marsac R, Pinson B, Saint-Marc C, Olmedo M, Artal-Sanz M, Daignan-Fornier B, et  
761 al. Purine Homeostasis Is Necessary for Developmental Timing, Germline  
762 Maintenance and Muscle Integrity in *Caenorhabditis elegans*. *Genetics*.  
763 2019;211(4):1297-313.
- 764 37. Becker MA, Losman MJ, Kim M. Mechanisms of accelerated purine nucleotide  
765 synthesis in human fibroblasts with superactive phosphoribosylpyrophosphate  
766 synthetases. *J Biol Chem*. 1987;262(12):5596-602.
- 767 38. Thompson LF, Willis RC, Stoop JW, Seegmiller JE. Purine metabolism in cultured  
768 human fibroblasts derived from patients deficient in hypoxanthine  
769 phosphoribosyltransferase, purine nucleoside phosphorylase, or adenosine  
770 deaminase. *Proc Natl Acad Sci U S A*. 1978;75(8):3722-6.
- 771 39. An S, Kumar R, Sheets ED, Benkovic SJ. Reversible compartmentalization of de  
772 novo purine biosynthetic complexes in living cells. *Science*. 2008;320(5872):103-6.
- 773 40. Zhao H, Chiaro CR, Zhang L, Smith PB, Chan CY, Pedley AM, et al. Quantitative  
774 analysis of purine nucleotides indicates that purinosomes increase de novo purine  
775 biosynthesis. *J Biol Chem*. 2015;290(11):6705-13.
- 776 41. Chan CY, Zhao H, Pugh RJ, Pedley AM, French J, Jones SA, et al. Purinosome  
777 formation as a function of the cell cycle. *Proc Natl Acad Sci U S A*.  
778 2015;112(5):1368-73.
- 779 42. Doigneaux C, Pedley AM, Mistry IN, Papayova M, Benkovic SJ, Tavassoli A.  
780 Hypoxia drives the assembly of the multienzyme purinosome complex. *J Biol Chem*.  
781 2020;295(28):9551-66.

- 782 43. Pedley AM, Benkovic SJ. A New View into the Regulation of Purine Metabolism: The  
783 Purinosome. *Trends Biochem Sci.* 2017;42(2):141-54.
- 784 44. Downie MJ, Saliba KJ, Howitt SM, Bröer S, Kirk K. Transport of nucleosides across  
785 the *Plasmodium falciparum* parasite plasma membrane has characteristics of  
786 PfENT1. *Mol Microbiol.* 2006;60(3):738-48.
- 787 45. El Bissati K, Zufferey R, Witola WH, Carter NS, Ullman B, Ben Mamoun C. The  
788 plasma membrane permease PfNT1 is essential for purine salvage in the human  
789 malaria parasite *Plasmodium falciparum*. *Proc Natl Acad Sci U S A.*  
790 2006;103(24):9286-91.
- 791 46. Dean P, Major P, Nakjang S, Hirt RP, Embley TM. Transport proteins of parasitic  
792 protists and their role in nutrient salvage. *Frontiers in Plant Science.* 2014;5(153).
- 793 47. Flinn AM, Gennery AR. Adenosine deaminase deficiency: a review. *Orphanet J Rare*  
794 *Dis.* 2018;13(1):65.
- 795 48. Torres RJ, Puig JG. Hypoxanthine-guanine phosphoribosyltransferase (HPRT)  
796 deficiency: Lesch-Nyhan syndrome. *Orphanet J Rare Dis.* 2007;2:48.
- 797 49. Kelley RE, Andersson HC. Disorders of purines and pyrimidines. *Handbook of*  
798 *clinical neurology.* 2014;120:827-38.
- 799 50. Tangye SG, Al-Herz W, Bousfiha A, Chatila T, Cunningham-Rundles C, Etzioni A, et  
800 al. Human Inborn Errors of Immunity: 2019 Update on the Classification from the  
801 International Union of Immunological Societies Expert Committee. *J Clin Immunol.*  
802 2020;40(1):24-64.
- 803 51. Whitmore KV, Gaspar HB. Adenosine Deaminase Deficiency – More Than Just an  
804 Immunodeficiency. *Frontiers in Immunology.* 2016;7(314).
- 805 52. Grunebaum E, Cohen A, Roifman CM. Recent advances in understanding and  
806 managing adenosine deaminase and purine nucleoside phosphorylase deficiencies.  
807 *Current opinion in allergy and clinical immunology.* 2013;13(6):630-8.
- 808 53. Markert ML. Purine nucleoside phosphorylase deficiency. *Immunodeficiency Rev.*  
809 1991;3(1):45-81.
- 810 54. Papinazath T, Min W, Sujiththa S, Cohen A, Ackerley C, Roifman CM, et al. Effects  
811 of purine nucleoside phosphorylase deficiency on thymocyte development. *J Allergy*  
812 *Clin Immunol.* 2011;128(4):854-63.e1.
- 813 55. Brenner S. The genetics of *Caenorhabditis elegans*. *Genetics.* 1974;77(1):71-94.
- 814 56. Kutscher LM, Shaham S. Forward and reverse mutagenesis in *C. elegans*.  
815 *WormBook.* 2014:1-26.
- 816 57. Davis MW, Hammarlund M, Harrach T, Hullett P, Olsen S, Jorgensen EM. Rapid  
817 single nucleotide polymorphism mapping in *C. elegans*. *BMC Genomics.*  
818 2005;6:118.
- 819 58. Arribere JA, Bell RT, Fu BX, Artiles KL, Hartman PS, Fire AZ. Efficient marker-free  
820 recovery of custom genetic modifications with CRISPR/Cas9 in *Caenorhabditis*  
821 *elegans*. *Genetics.* 2014;198(3):837-46.
- 822 59. Andrusiak MG, Sharifnia P, Lyu X, Wang Z, Dickey AM, Wu Z, et al. Inhibition of  
823 Axon Regeneration by Liquid-like TIAR-2 Granules. *Neuron.* 2019;104(2):290-304  
824 e8.
- 825 60. McReynolds MR, Wang W, Holleran LM, Hanna-Rose W. Uridine monophosphate  
826 synthetase enables eukaryotic de novo NAD(+) biosynthesis from quinolinic acid. *J*  
827 *Biol Chem.* 2017;292(27):11147-53.

- 828 61. Djonović S, Urbach JM, Drenkard E, Bush J, Feinbaum R, Ausubel JL, et al.  
829 Trehalose biosynthesis promotes *Pseudomonas aeruginosa* pathogenicity in plants.  
830 PLoS Pathog. 2013;9(3):e1003217.  
831 62. Afgan E, Baker D, Batut B, van den Beek M, Bouvier D, Cech M, et al. The Galaxy  
832 platform for accessible, reproducible and collaborative biomedical analyses: 2018  
833 update. Nucleic Acids Res. 2018;46(W1):W537-w44.  
834

835

## 836 Figure Legends

837

### 838 Fig 1. *pnp-1* mutants have increased expression of IPR genes

839 A) Gene structure of the two isoforms of *pnp-1* with exons indicated as black boxes. 5'  
840 and 3' untranslated regions are not shown. B-D) *pals-5p::GFP* IPR reporter expression  
841 in wild-type animals, *pnp-1(jy90)* and *pnp-1(jy121)* mutants. *myo-2p::mCherry* is a  
842 pharyngeal marker for the presence of the IPR reporter transgene. Scale bar is 100  $\mu$ m.  
843 E) qRT-PCR of a subset of IPR genes in *pnp-1(jy90)* and *pnp-1(jy121)* mutants. Fold  
844 change in gene expression is shown relative to wild-type animals. Graph shows the  
845 mean fold change of three independent experiments. Error bars are standard deviation  
846 (SD). Mixed stage populations of animals were used. \*\*\*\* indicates  $p < 0.0001$  by one-  
847 tailed t-test. F) Quantification of inosine and hypoxanthine levels in *pnp-1* and *pals-22*  
848 mutants from metabolomics analysis. Graph shows the mean levels of metabolites from  
849 six independent experiments for *pnp-1(jy121)*, *pnp-1(jy90)* and *pals-22(jy1)* mutants,  
850 and five independent experiments for wild-type animals. Error bars are standard error of  
851 the mean (SEM). \*\*\*\* indicates  $p < 0.0001$  by one-way ANOVA. E,F) Red dots indicate  
852 values from individual experiments. See materials and methods for more information.

853

### 854 Fig 2. *pnp-1* regulates intracellular pathogen resistance

855 A) qRT-PCR for Orsay viral load in wild-type animals, *pnp-1(jy90)*, *pnp-1(jy121)* and  
856 *pals-22(jy1)* mutants. Fold change in gene expression is shown relative to wild-type  
857 animals. Graph shows results of four independent experiments. Mean is shown with  
858 error bars as SD. Synchronized fourth larval stage (L4) animals were used. \*\*\*\*  
859 indicates  $p < 0.0001$  by one-tailed t-test. B) Quantification of *N. parisii* sporoplasm  
860 number in wild-type animals, *pnp-1(jy90)*, *pnp-1(jy121)* and *pals-22(jy1)* first larval stage



861 (L1) mutants at 3 hpi. n=225 animals per genotype. Box represents 50% of the data  
862 closest to the median while whiskers span the values outside the box. C) Quantification  
863 of *N. parisii* pathogen load in wild-type animals, *pnp-1(jy90)*, *pnp-1(jy121)* and *pals-*  
864 *22(jy1)* L1 mutants at 30 hpi. n=300 animals per genotype. *N. parisii* load per animal  
865 was quantified with the COPAS Biosort machine and normalized to time-of-flight as  
866 proxy for the length of the animal. Graph shows combined results of three independent  
867 experiments. Mean is shown with error bars as SD. B, C) *N. parisii* was visualized using  
868 an *N. parisii* rRNA specific probe. Each graph shows the combined results of three  
869 independent experiments. D) Survival of wild-type, *pnp-1(jy90)* and *pnp-1(jy121)*  
870 mutants after infection with *N. parisii*. n=120 per genotype. One experiment of four  
871 independent experiments is shown (see Supplemental Figure 3 for additional three  
872 experiments). E) Quantification of fluorescent bead accumulation in wild-type animals,  
873 *pnp-1(jy90)*, *pnp-1(jy121)* and *eat-2(ad465)* mutants. n=150 animals per genotype. The  
874 corrected total fluorescence (CTF) per worm was calculated and normalized to worm  
875 area. Graph shows combined results of three independent experiments. Mean is shown  
876 with error bars as standard error of the mean. B-E) \*\*\*\* indicates  $p < 0.0001$  by one-way  
877 ANOVA.

878

### 879 **Fig 3. *pnp-1* functions in the intestine to regulate the IPR**

880 A) Expression of *PNP-1::EGFP::3XFLAG* under control of the wild-type *pnp-1* genomic  
881 locus. Asterisks indicate intestines, arrows indicate neurons. Scale bar is 100  $\mu$ m. B)  
882 Quantification of *N. parisii* sporoplasm number at 3 hpi in *pnp-1* mutants containing the  
883 rescuing *pnp-1::EGFP::3XFLAG* genomic locus in L1 animals (indicated as "+WT *pnp-*  
884 *1*"), as well as their non-transgenic siblings (indicated as "-WT *pnp-1*"). n=255 animals  
885 per genotype. C) Quantification of *N. parisii* sporoplasm number at 3 hpi in *pnp-1*  
886 mutants containing wild-type *pnp-1* cDNA under the control the *vha-6* (intestinal) or *unc-*  
887 *119* (neuronal) promoters in L1 animals). n=150 per genotype. B, C) *N. parisii* was  
888 visualized using an *N. parisii* rRNA specific probe. Box represents 50% of the data  
889 closest to the median while whiskers span the values outside the box. Each graph  
890 shows the combined results of three independent experiments. In the graphs, the box  
891 represents the 50% of the data closest to the median while the whiskers span the

892 values outside the box. \*\*\*\* indicates  $p < 0.0001$  by one-way ANOVA. D) qRT-PCR of a  
893 subset of IPR genes in adult *pnp-1* mutants containing wild-type *pnp-1* cDNA under the  
894 control the *vha-6* or *unc-119* promoter. Fold change in gene expression is shown  
895 relative to control. Graphs show the combined results of three independent  
896 experiments. \*\*\*\* indicates  $p < 0.0001$  by one-tailed t-test.

897

898 **Fig 4. Lifespan, thermotolerance and *P. aeruginosa* resistance phenotypes of**  
899 ***pnp-1* mutants**

900 A) Lifespan of wild-type animals, *pnp-1(jy90)* and *pnp-1(jy121)* mutants. n=90 animals  
901 per genotype. Results from one representative experiment of four independent  
902 experiments is shown (see S5 Fig for additional three experiments). Survival of each  
903 mutant population was compared to that of the wild-type population with the Log-rank  
904 (Mantel-Cox) test. B) Survival of wild-type animals, *pnp-1(jy90)* and *pnp-1(jy121)*  
905 mutants 24 hours after 2 hour 37°C heat shock. C) Survival of wild-type animals, *pnp-*  
906 *1(jy90)*, *pals-22(jy1)* and *pals-22(jy1); pnp-1(jy90)* mutants 24 hours after 2 hour 37°C  
907 heat shock. B,C) For one experiment, three plates per genotype with 30 worms per  
908 plate were tested. One dot represents the survival from one plate. The graphs show the  
909 mean survival of three independent experiments. Error bars are SD. D) Quantification of  
910 PA14-dsRED pathogen load in L4 stage wild-type animals, *pnp-1(jy90)* and *pnp-*  
911 *1(jy121)* mutants at 16 hpi. E) Quantification of PA14-dsRED pathogen load in L4 stage  
912 wild-type animals, *pnp-1(jy90)*, *pals-22(jy1)*, *pmk-1(km25)*, *pnp-1(jy90) pmk-1(km25)*  
913 and *pals-22(jy1); pmk-1(km25)* mutants at 16 hpi. D, E) PA14-dsRED red fluorescence  
914 per animal was quantified with the COPAS Biosort machine and normalized to time-of-  
915 flight as proxy for the length of the animal. Graph shows the combined results of three  
916 independent experiments. Each dot represents an individual animal. Mean is shown  
917 with error bars as SD. F) Quantification of *N. parisii* sporoplasm number in wild-type  
918 animals, *pnp-1(jy90)*, *pals-22(jy1)*, *pmk-1(km25)*, *pnp-1(jy90) pmk-1(km25)* and *pals-*  
919 *22(jy1); pmk-1(km25)* mutants at 3 hpi. n=400 animals per genotype. *N. parisii* was  
920 visualized using an *N. parisii* rRNA specific probe. Each dot represents an individual  
921 animal, and the graph shows the combined results of four independent experiments.



922 The box represents the 50% of the data closest to the median while the whiskers span  
923 the values outside the box. B-E) \*\*\*\* indicates  $p < 0.0001$  by one-way ANOVA.

924

925 **Fig 5. RNA-seq analysis demonstrates that *pnp-1* represses expression of many**  
926 **IPR genes**

927 A) Venn diagram of differentially expressed genes in *pnp-1(jy90)* and *pnp-1(jy121)*  
928 mutants as compared to wild-type animals. Both up ( $rf = 31.5$ ;  $p < 0.000e+00$ ) and down  
929 ( $rf = 239.6$ ;  $p < 3.489e-58$ ) regulated genes have significant overlap between the two  
930 mutant alleles (S6 Table). B) Venn diagram of upregulated genes in *pnp-1(jy90)*, *pnp-*  
931 *1(jy121)* and *pals-22(jy3)* mutants as compared to wild-type animals. Upregulated  
932 genes in both *pnp-1(jy90)* ( $rf = 2.9$ ;  $p < 4.566e-62$ ) and *pnp-1(jy121)* ( $rf = 2.8$ ;  $p <$   
933  $1.591e-52$ ) mutants have significant overlap with those upregulated in *pals-22(jy3)*  
934 mutants from a previous study (S6 Table) [17]. A, B)  $rf$  is the ratio of actual overlap to  
935 expected overlap where  $rf > 1$  indicates overrepresentation and  $rf < 1$  indicates  
936 underrepresentation. C) Log<sub>2</sub> fold-change of *pals* genes in *pnp-1(jy90)* and *pnp-*  
937 *1(jy121)* mutants normalized to wild-type. D) Log<sub>2</sub> fold change of a subset of non-*pals*  
938 genes in *pnp-1(jy90)* and *pnp-1(jy121)* mutants normalized to wild-type. E) Correlation  
939 between genes differentially expressed by various known IPR activators and those  
940 differentially expressed in *pnp-1(jy90)* or *pnp-1(jy121)* mutants. F) Wormcat analysis for  
941 significantly enriched categories in differentially expressed gene sets of *pnp-1(jy90)* and  
942 *pnp-1(jy121)* mutants. Size of the circles indicates the number of the genes and color  
943 indicates value of significant over representation in each Wormcat category. G)  
944 Correlation of genes differentially expressed by bacterial pathogens, immune regulators,  
945 and various stressors to those differentially expressed in *pnp-1(jy90)* or *pnp-1(jy121)*  
946 mutants. E, G) Analysis was performed using GSEA 3.0 software, and correlations of  
947 genes sets (S4 Table) were quantified as a Normalized Enrichment Score (NES) (S5  
948 Table). NES's presented in a heat map. Blue indicates significant correlation of  
949 downregulated genes in a *pnp-1* mutant with the tested gene set, yellow indicates  
950 significant correlation of upregulated genes in a *pnp-1* mutant with the tested gene set,  
951 while black indicates no significant correlation ( $p > 0.05$  or False Discovery Rate  $<$   
952  $0.25$ ).

953

954 **Fig 6. Model for *pnp-1* regulation of immune responses**

955 A) *pnp-1* negatively regulates mRNA expression of IPR genes induced by infection with  
956 the intracellular pathogens the Orsay virus and *N. parisii* (microsporidia). Loss of *pnp-1*  
957 or *pals-22* results in constitutive expression of IPR genes and resistance to the Orsay  
958 virus and *N. parisii*. *pmk-1* (p38 MAPK) mutants display increased susceptibility to *N.*  
959 *parisii* as compared to wild-type animals. Because IPR genes are distinct from *pmk-1*-  
960 regulated genes, and *pnp-1* mutant resistance does not require *pmk-1*, we favor a  
961 model where *pmk-1* acts in parallel to the IPR. B) *pnp-1* negatively regulates genes that  
962 are induced by various extracellular pathogens and *pnp-1* mutants are resistant to  
963 infection by the extracellular Gram-negative pathogen *P. aeruginosa*. Resistance to *P.*  
964 *aeruginosa* in *pnp-1* mutants requires *pmk-1*, and *pnp-1* mutants have upregulation of  
965 genes induced by wild-type *pmk-1*, suggesting that here, *pnp-1* functions upstream of  
966 *pmk-1*.

967

968 **Supplemental Figure Legends**

969

970 **S1 Fig. Alignment of PNP proteins across species**

971 Alignment of PNP protein sequences from *C. elegans* (two isoforms, PNP-1a and PNP-  
972 1b), *Drosophila melanogaster* (DmPNP), *Mus musculus* (MsPNP) and *Homo sapiens*  
973 (HsPNP). Similar amino acids shaded gray, identical amino acids shaded black. Red  
974 indicates the serine converted to leucine in *pnp-1* mutants. Clustal Omega was used to  
975 perform the alignment (<https://www.ebi.ac.uk/Tools/msa/clustalo/>). BoxShade  
976 ([https://embnet.vital-it.ch/software/BOX\\_form.html](https://embnet.vital-it.ch/software/BOX_form.html)) was used to annotate sequence  
977 homology.

978

979 **S2 Fig. Quantification by LC-MS of purine metabolites in *pnp-1* and *pals-22*  
980 mutants**

981 A) Schematic of purine synthesis pathways with select metabolites included. The  
982 degradation pathway is highlighted in red. The de novo pathway and metabolites is  
983 highlighted in blue. Metabolites that are not highlighted are common to both pathways.

984 B-D) Quantification of adenosine, de novo specific metabolites and purine nucleotides,  
985 respectively (inosine and hypoxanthine are shown in Fig 1F). Graphs show the mean  
986 amount (in log<sub>10</sub> scale) of the metabolites of six independent experiments for *pnp-*  
987 *1(jy121)*, *pnp-1(jy90)* and *pals-22(jy1)* mutants and five independent experiments wild-  
988 type animals. Red dots show individual values for each experiment. Error bars are SEM.  
989 Unless otherwise indicated, there is no significant difference in metabolite amounts in  
990 *pnp-1* mutants or *pals-22* mutants compared to control as determined by one-way  
991 ANOVA. \* indicates  $p < 0.05$ . Abbreviations used: R5P is ribose-5-phosphate; GAR is  
992 glycineamide ribonucleotide; CAIR is 5'-phosphoribosyl-4-carboxy-5-aminoimidazole;  
993 SAICAR is succinylaminoimidazole carboxamide ribotide; AICAR is 5-Aminoimidazole-  
994 4-carboxamide ribonucleotide; IMP is inosine monophosphate; XMP is xanthine  
995 monophosphate; GMP is guanosine monophosphate; S-AMP is adenylosuccinate; AMP  
996 is adenosine monophosphate.

997

998 **S3 Fig. Individual experiments for survival of wild-type, *pnp-1(jy90)* and *pnp-***  
999 ***1(jy121)* after *N. parisii* infection**

1000

1001 **S4 Fig. Dil filling of animals expressing *pnp-1::EGFP::3XFLAG***

1002 Transgenic *pnp-1::EGFP::3XFLAG* TransgeneOme animals, stained with the lipophilic  
1003 fluorescent dye Dil, which labels amphid neurons in red. GFP-expressing cells  
1004 (indicated by green arrows) are distinct from Dil-labeled cells (indicated by red arrows),  
1005 suggesting that *pnp-1* is not expressed in amphid neurons. Each row is an individual  
1006 animal and scale bar is 20  $\mu\text{m}$ . The head of the animal is shown with anterior to the left.  
1007 Worm bodies are outlined in white. Asterisks indicate GFP-expressing intestines. The  
1008 exposure time for GFP in the bottom row is higher than that of the above two panels to  
1009 better visualize the GFP-expressing processes extending anteriorly.

1010

1011 **S5 Fig. Individual experiments for lifespan of wild-type animals, *pnp-1(jy90)* and**  
1012 ***pnp-1(jy121)* mutants**

1013

1014 **Supplementary Tables**

- 1015 **S1 Table. Lists of strains, plasmids and primers**
- 1016 **S2 Table. RNA-seq statistics**
- 1017 **S3 Table. Differentially expressed genes lists**
- 1018 **S4 Table. Gene sets used for GSEA**
- 1019 **S5 Table. Detailed GSEA results**
- 1020 **S6 Table. Detailed results of hypergeometric testing**
- 1021 **S7 Table. Detailed GO Term results**
- 1022 **S8 Table. Detailed Wormcat results**

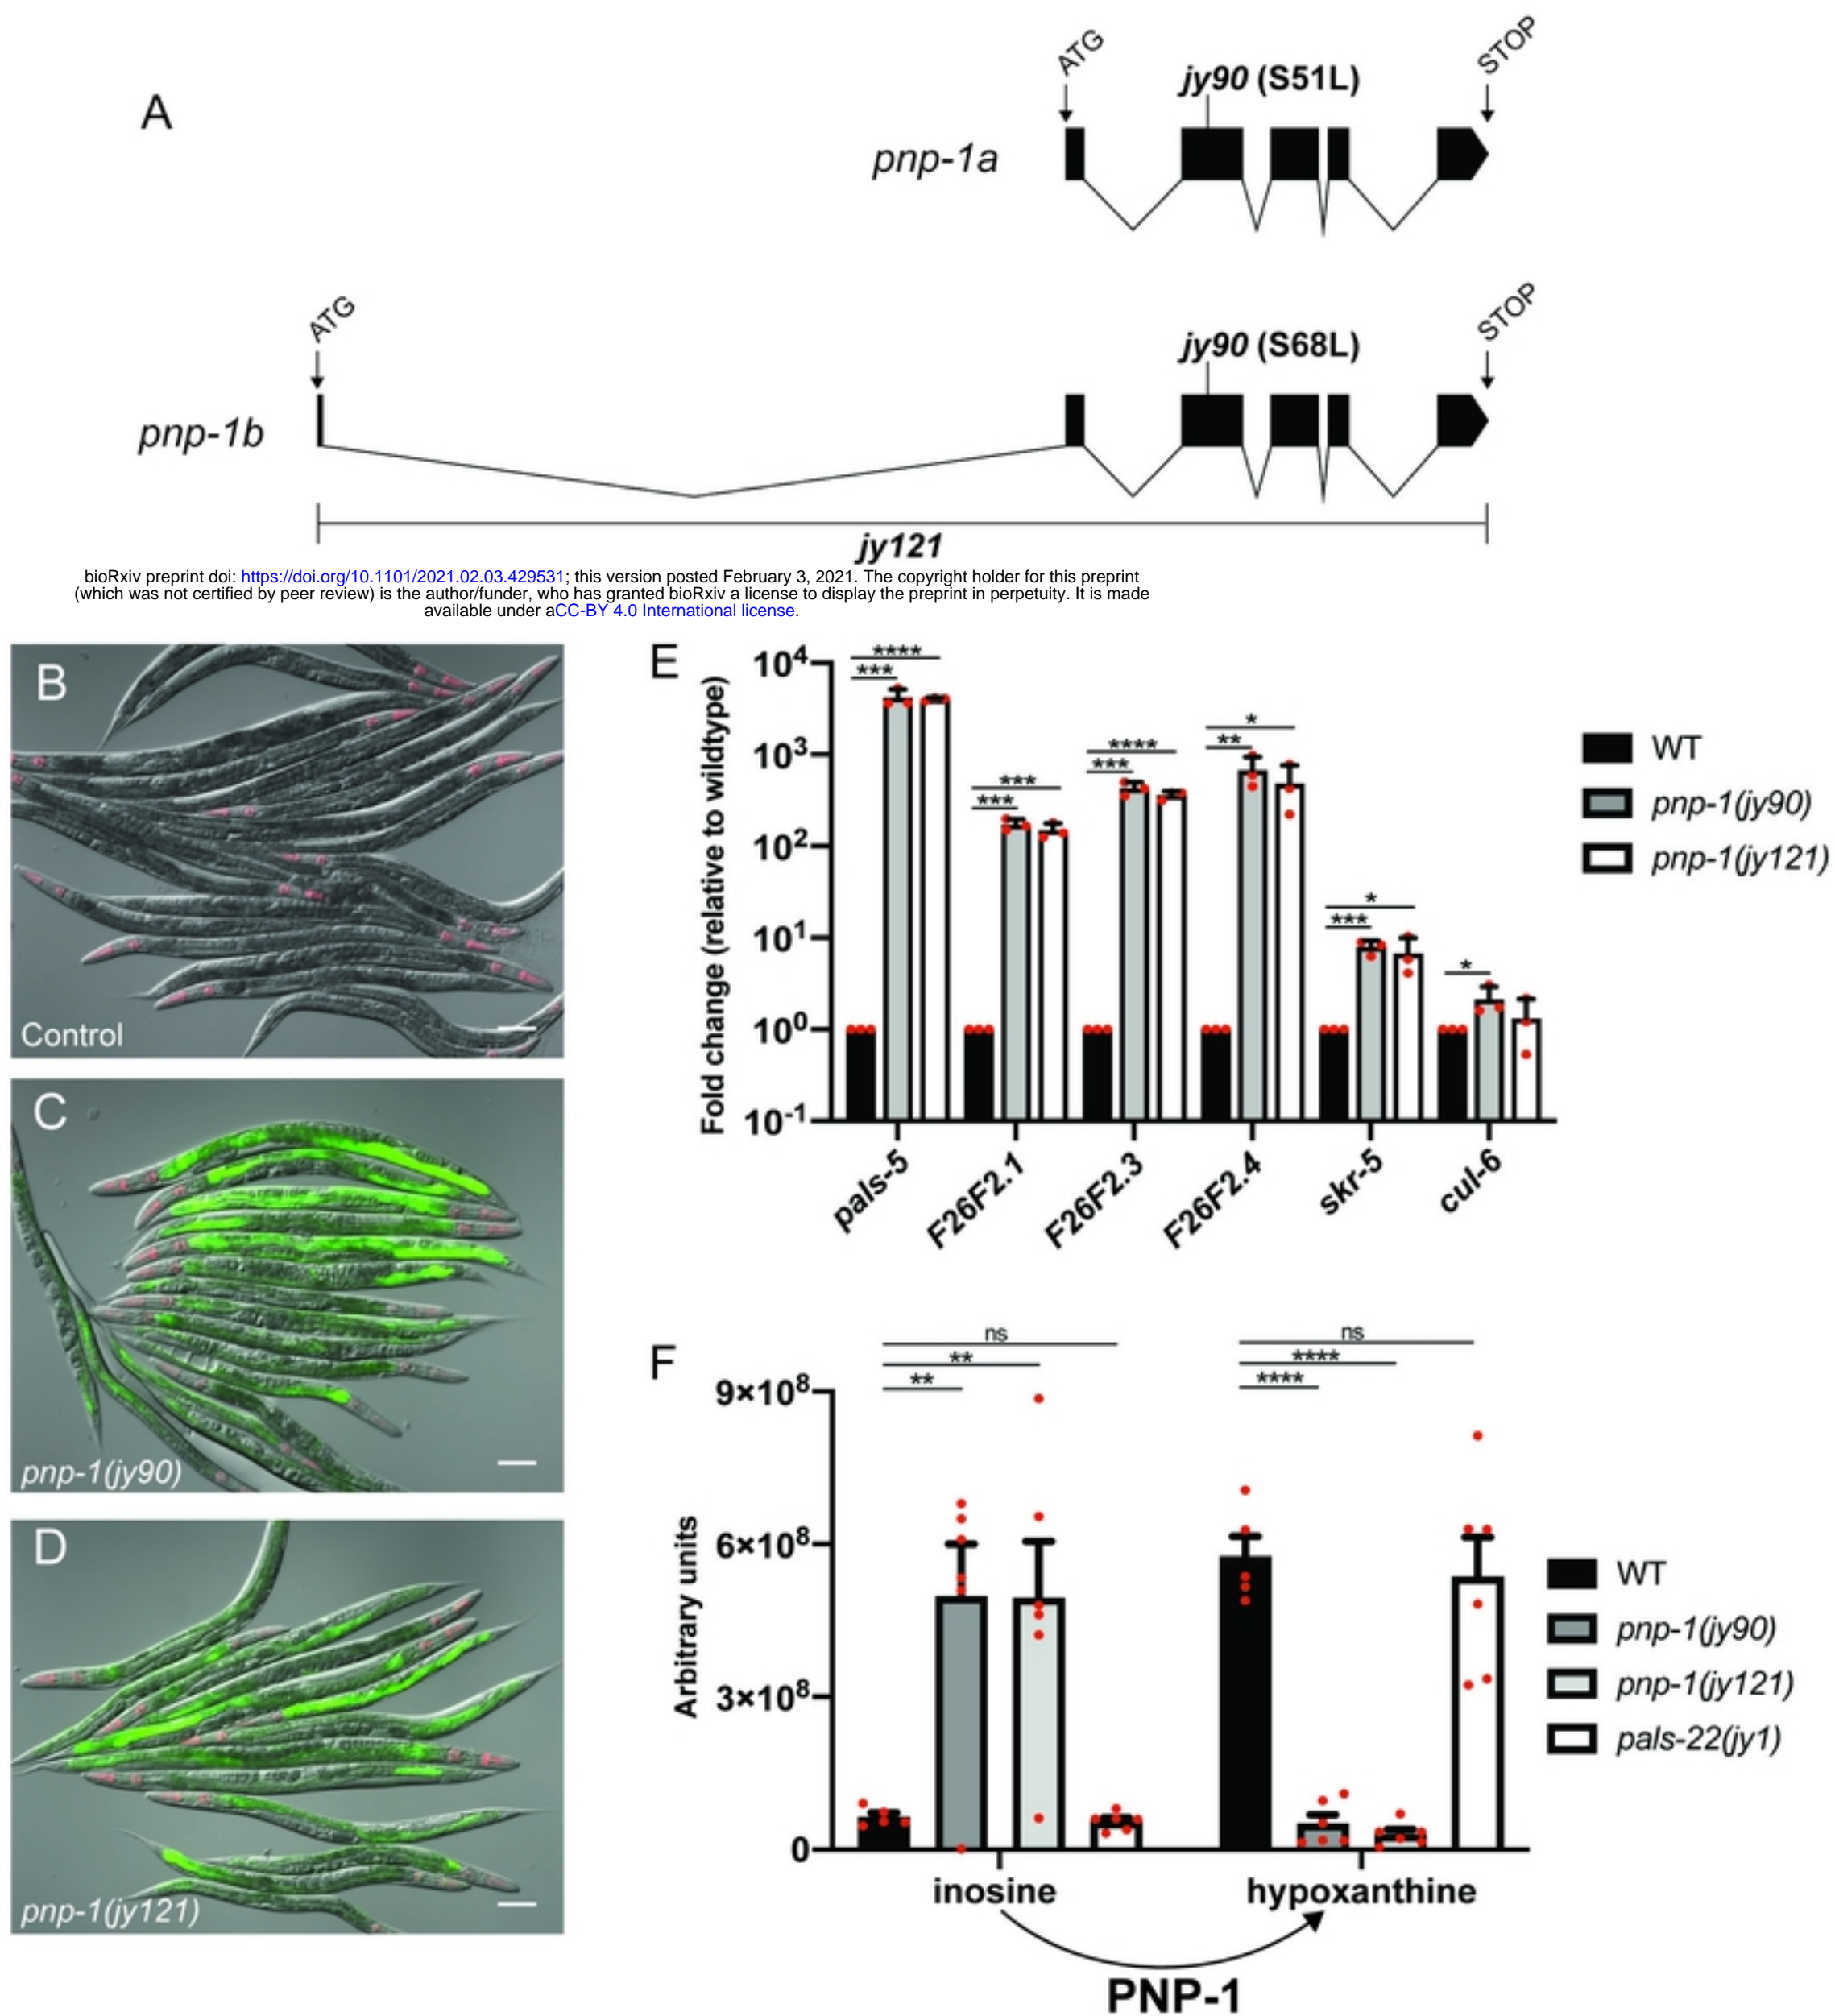

Fig 1



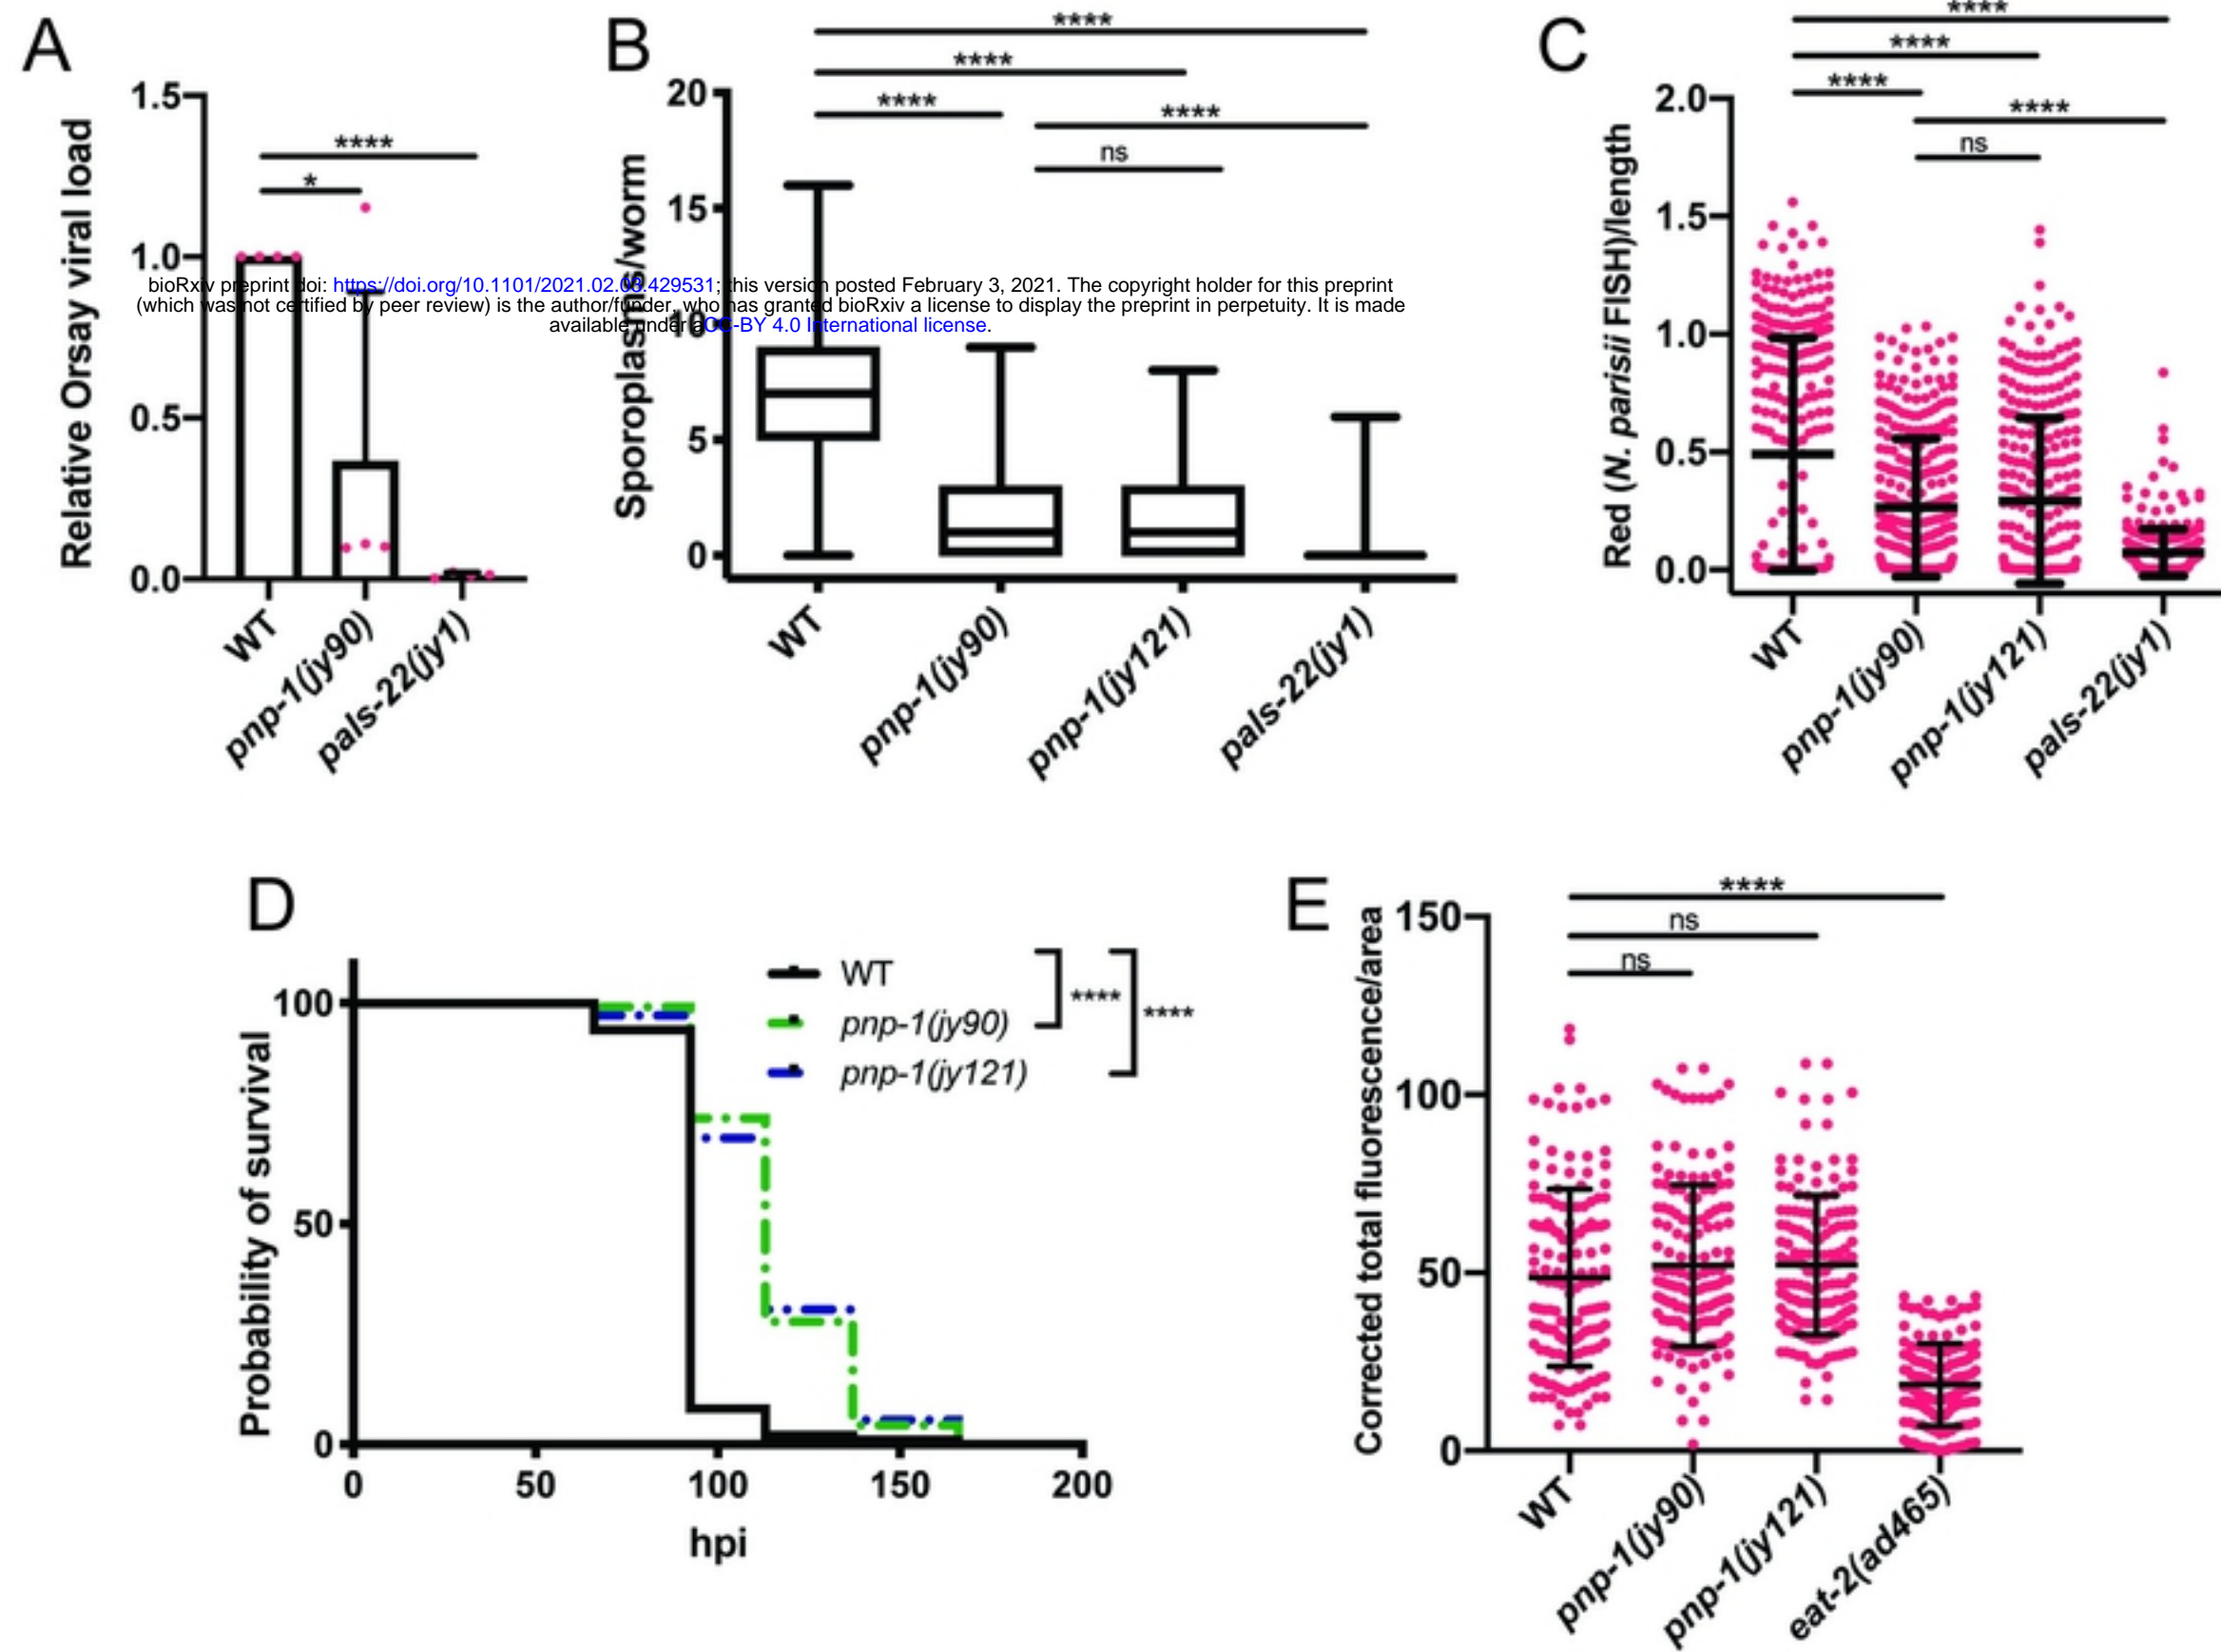

Fig 2

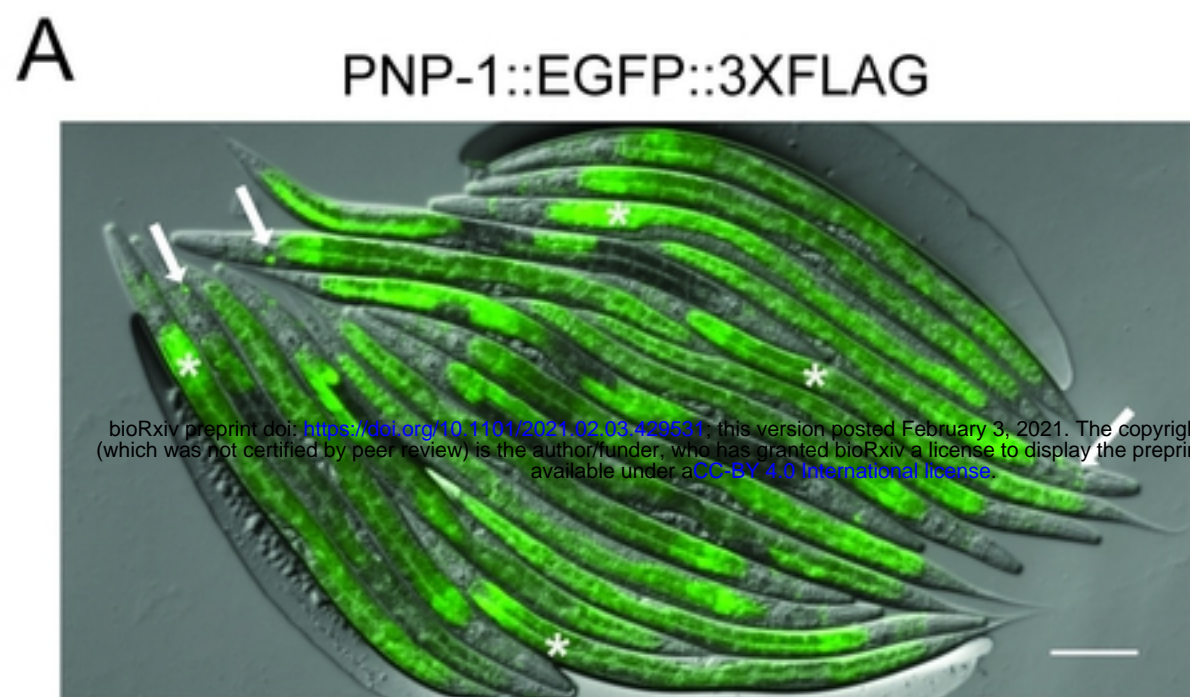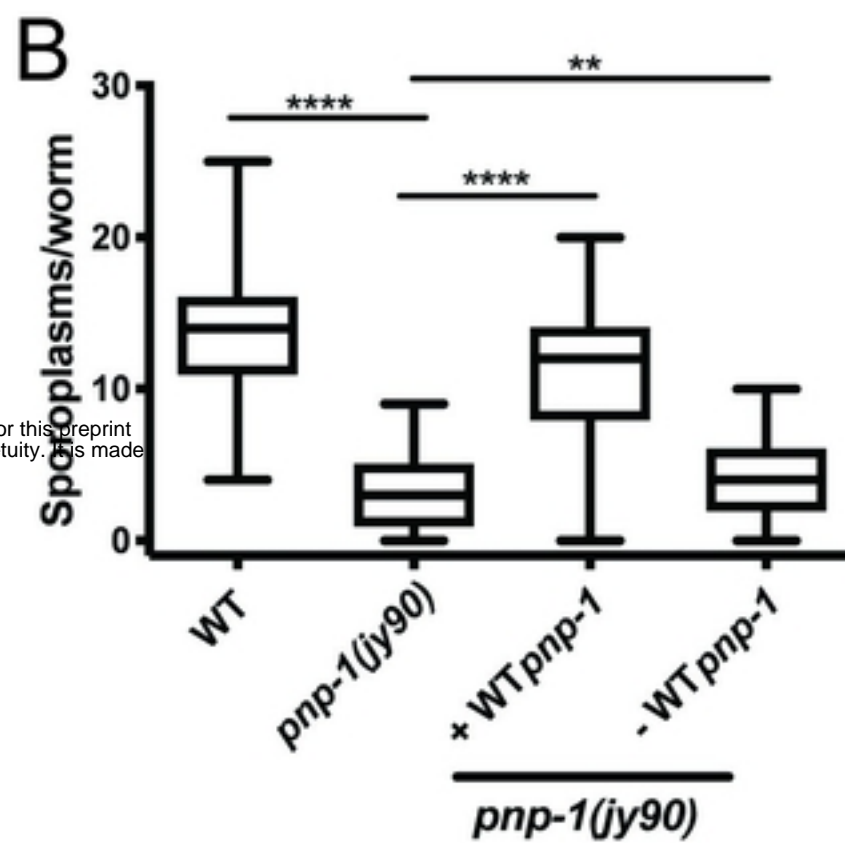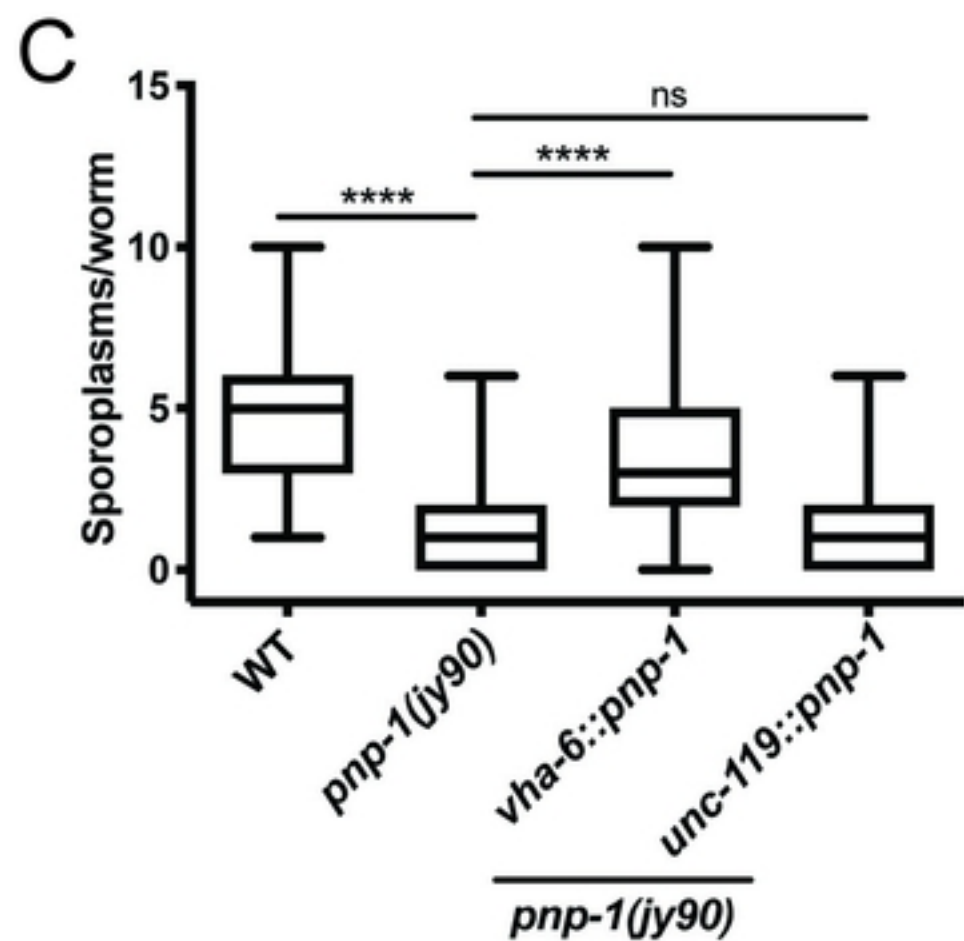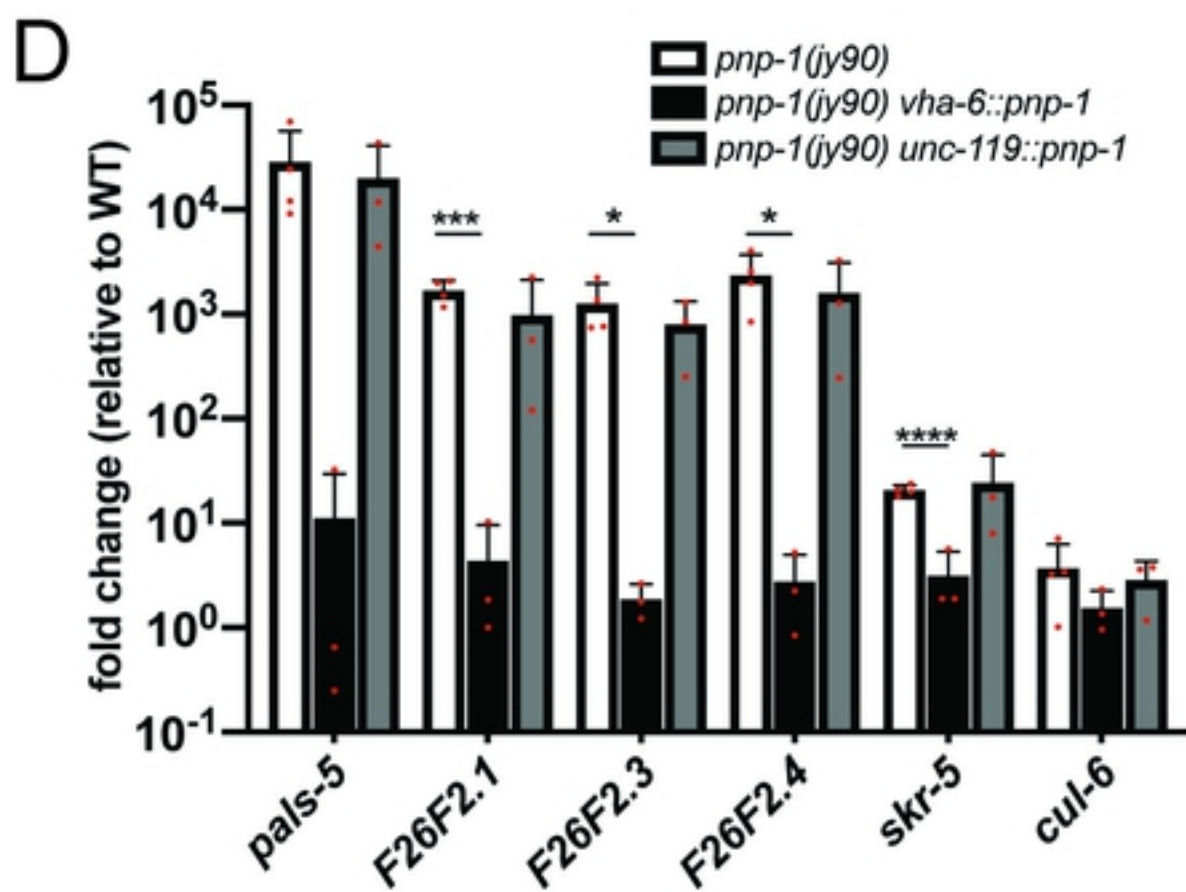

Fig 3



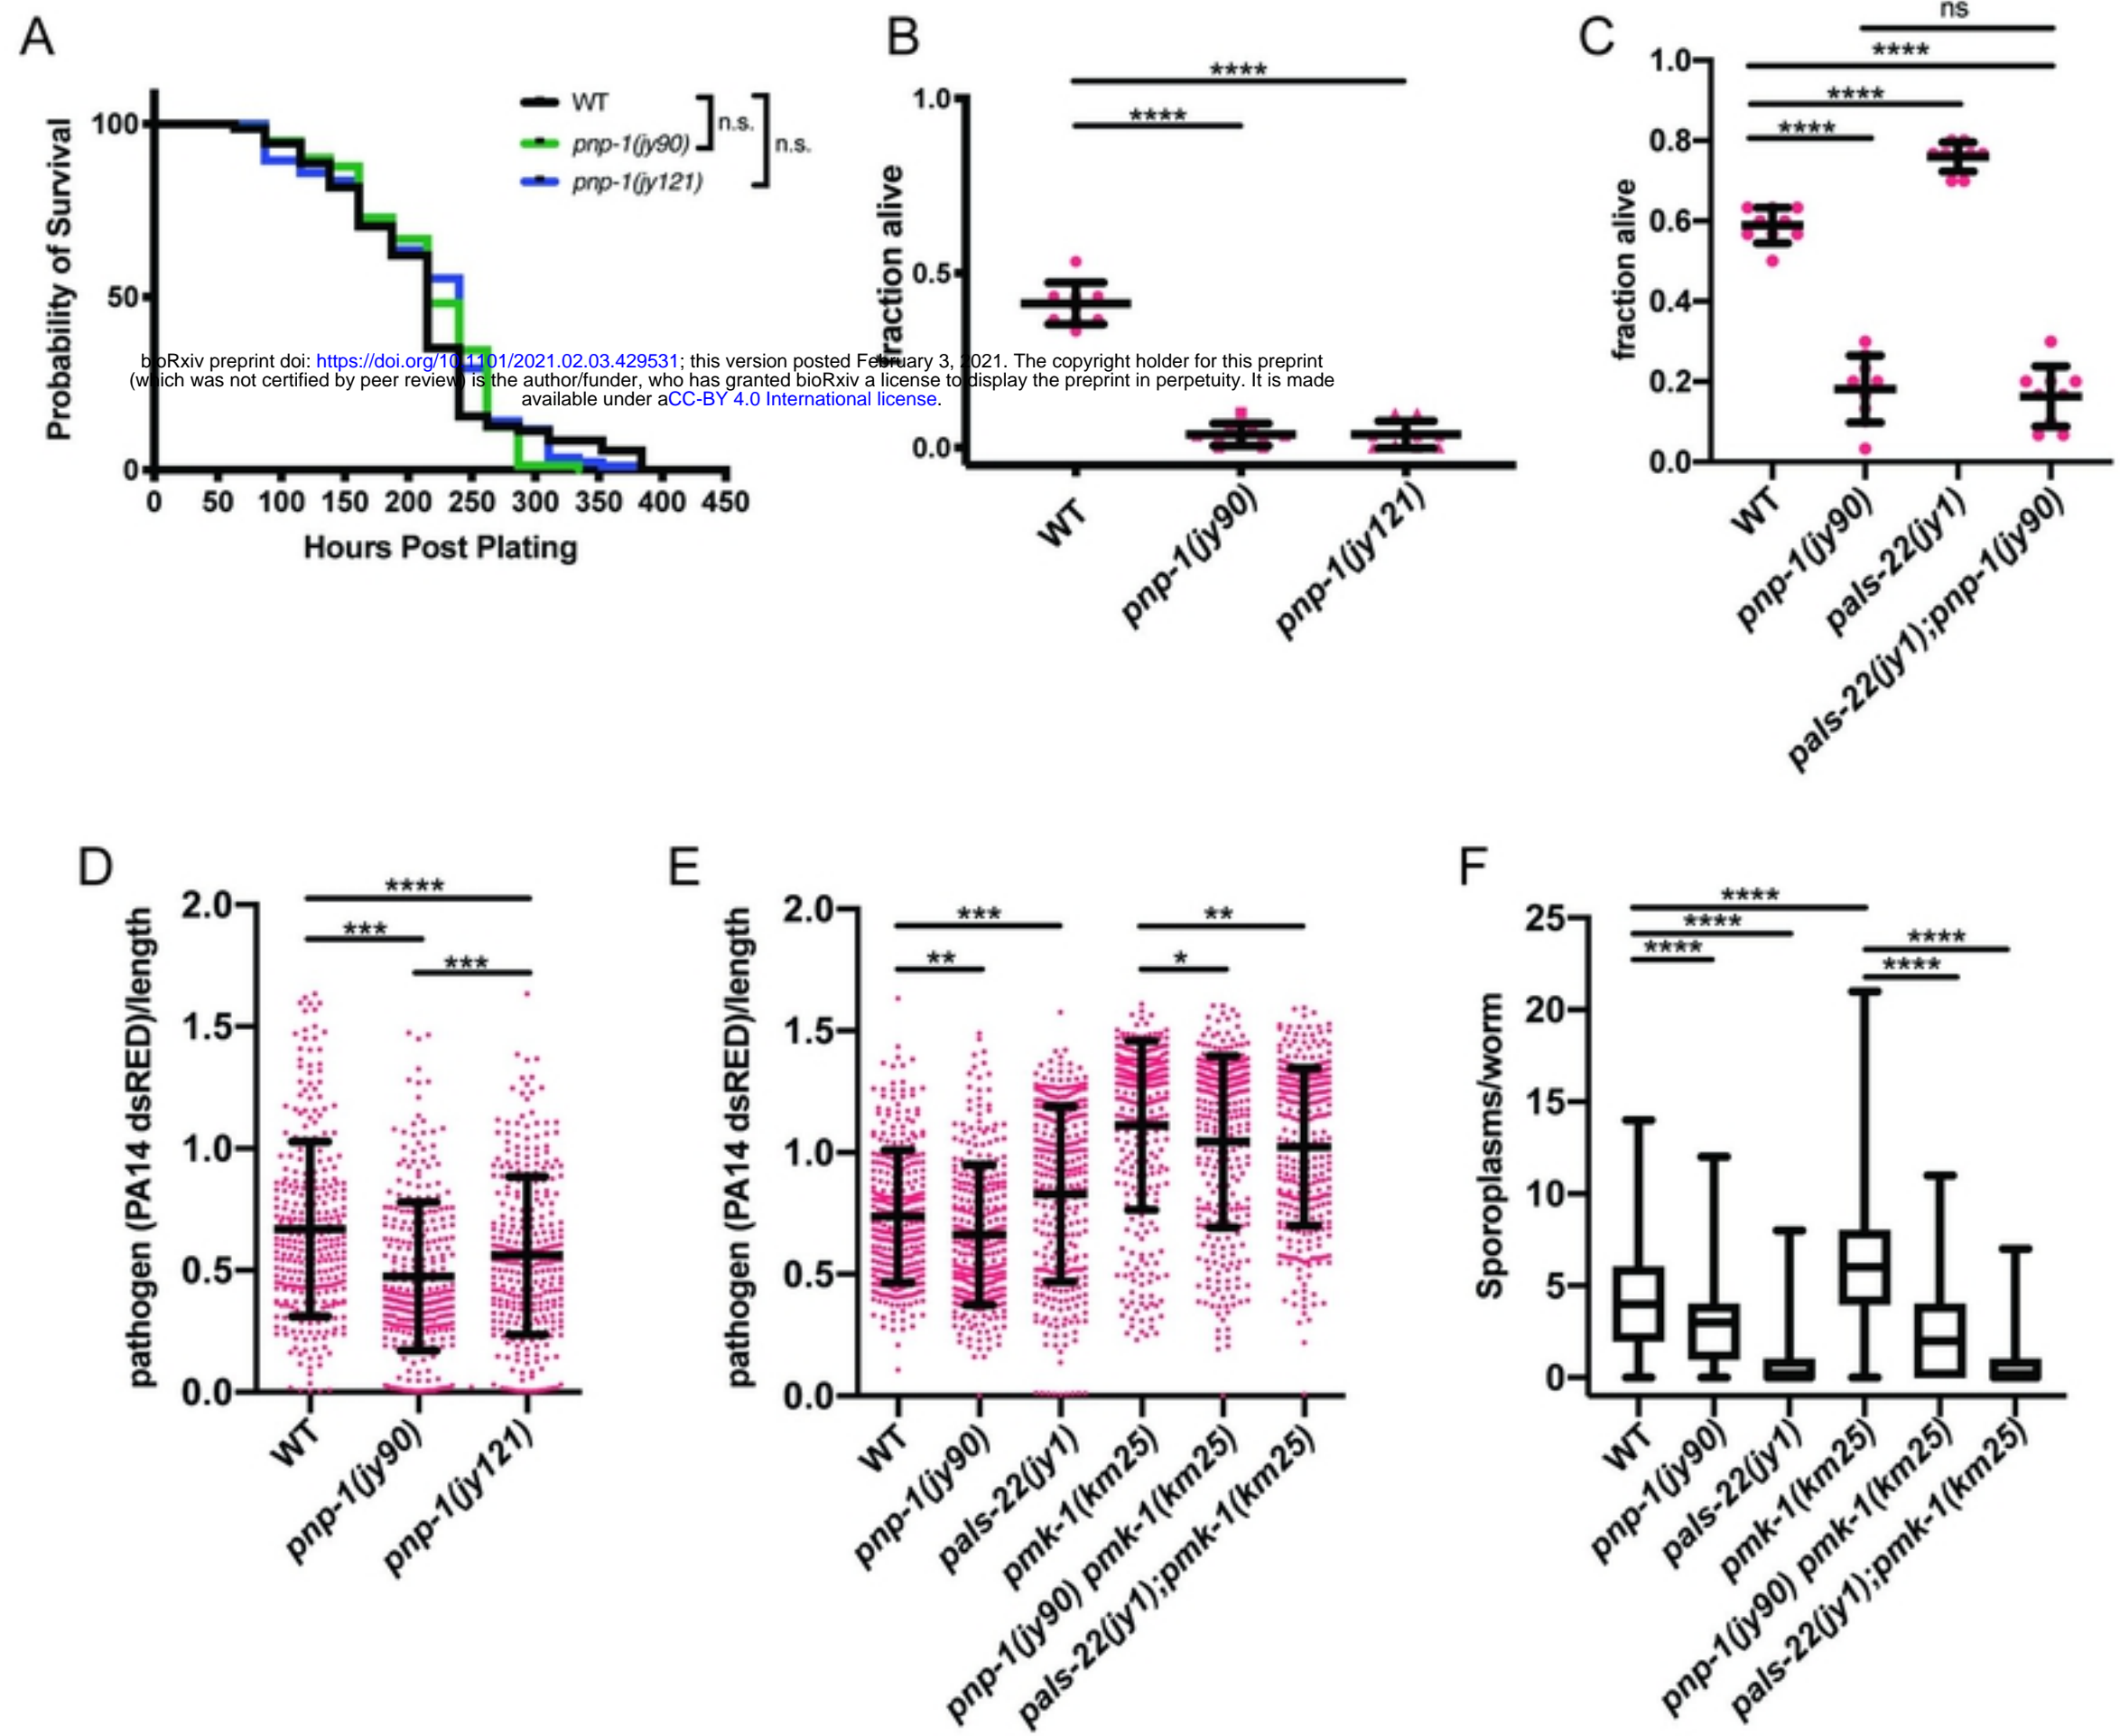

Fig 4

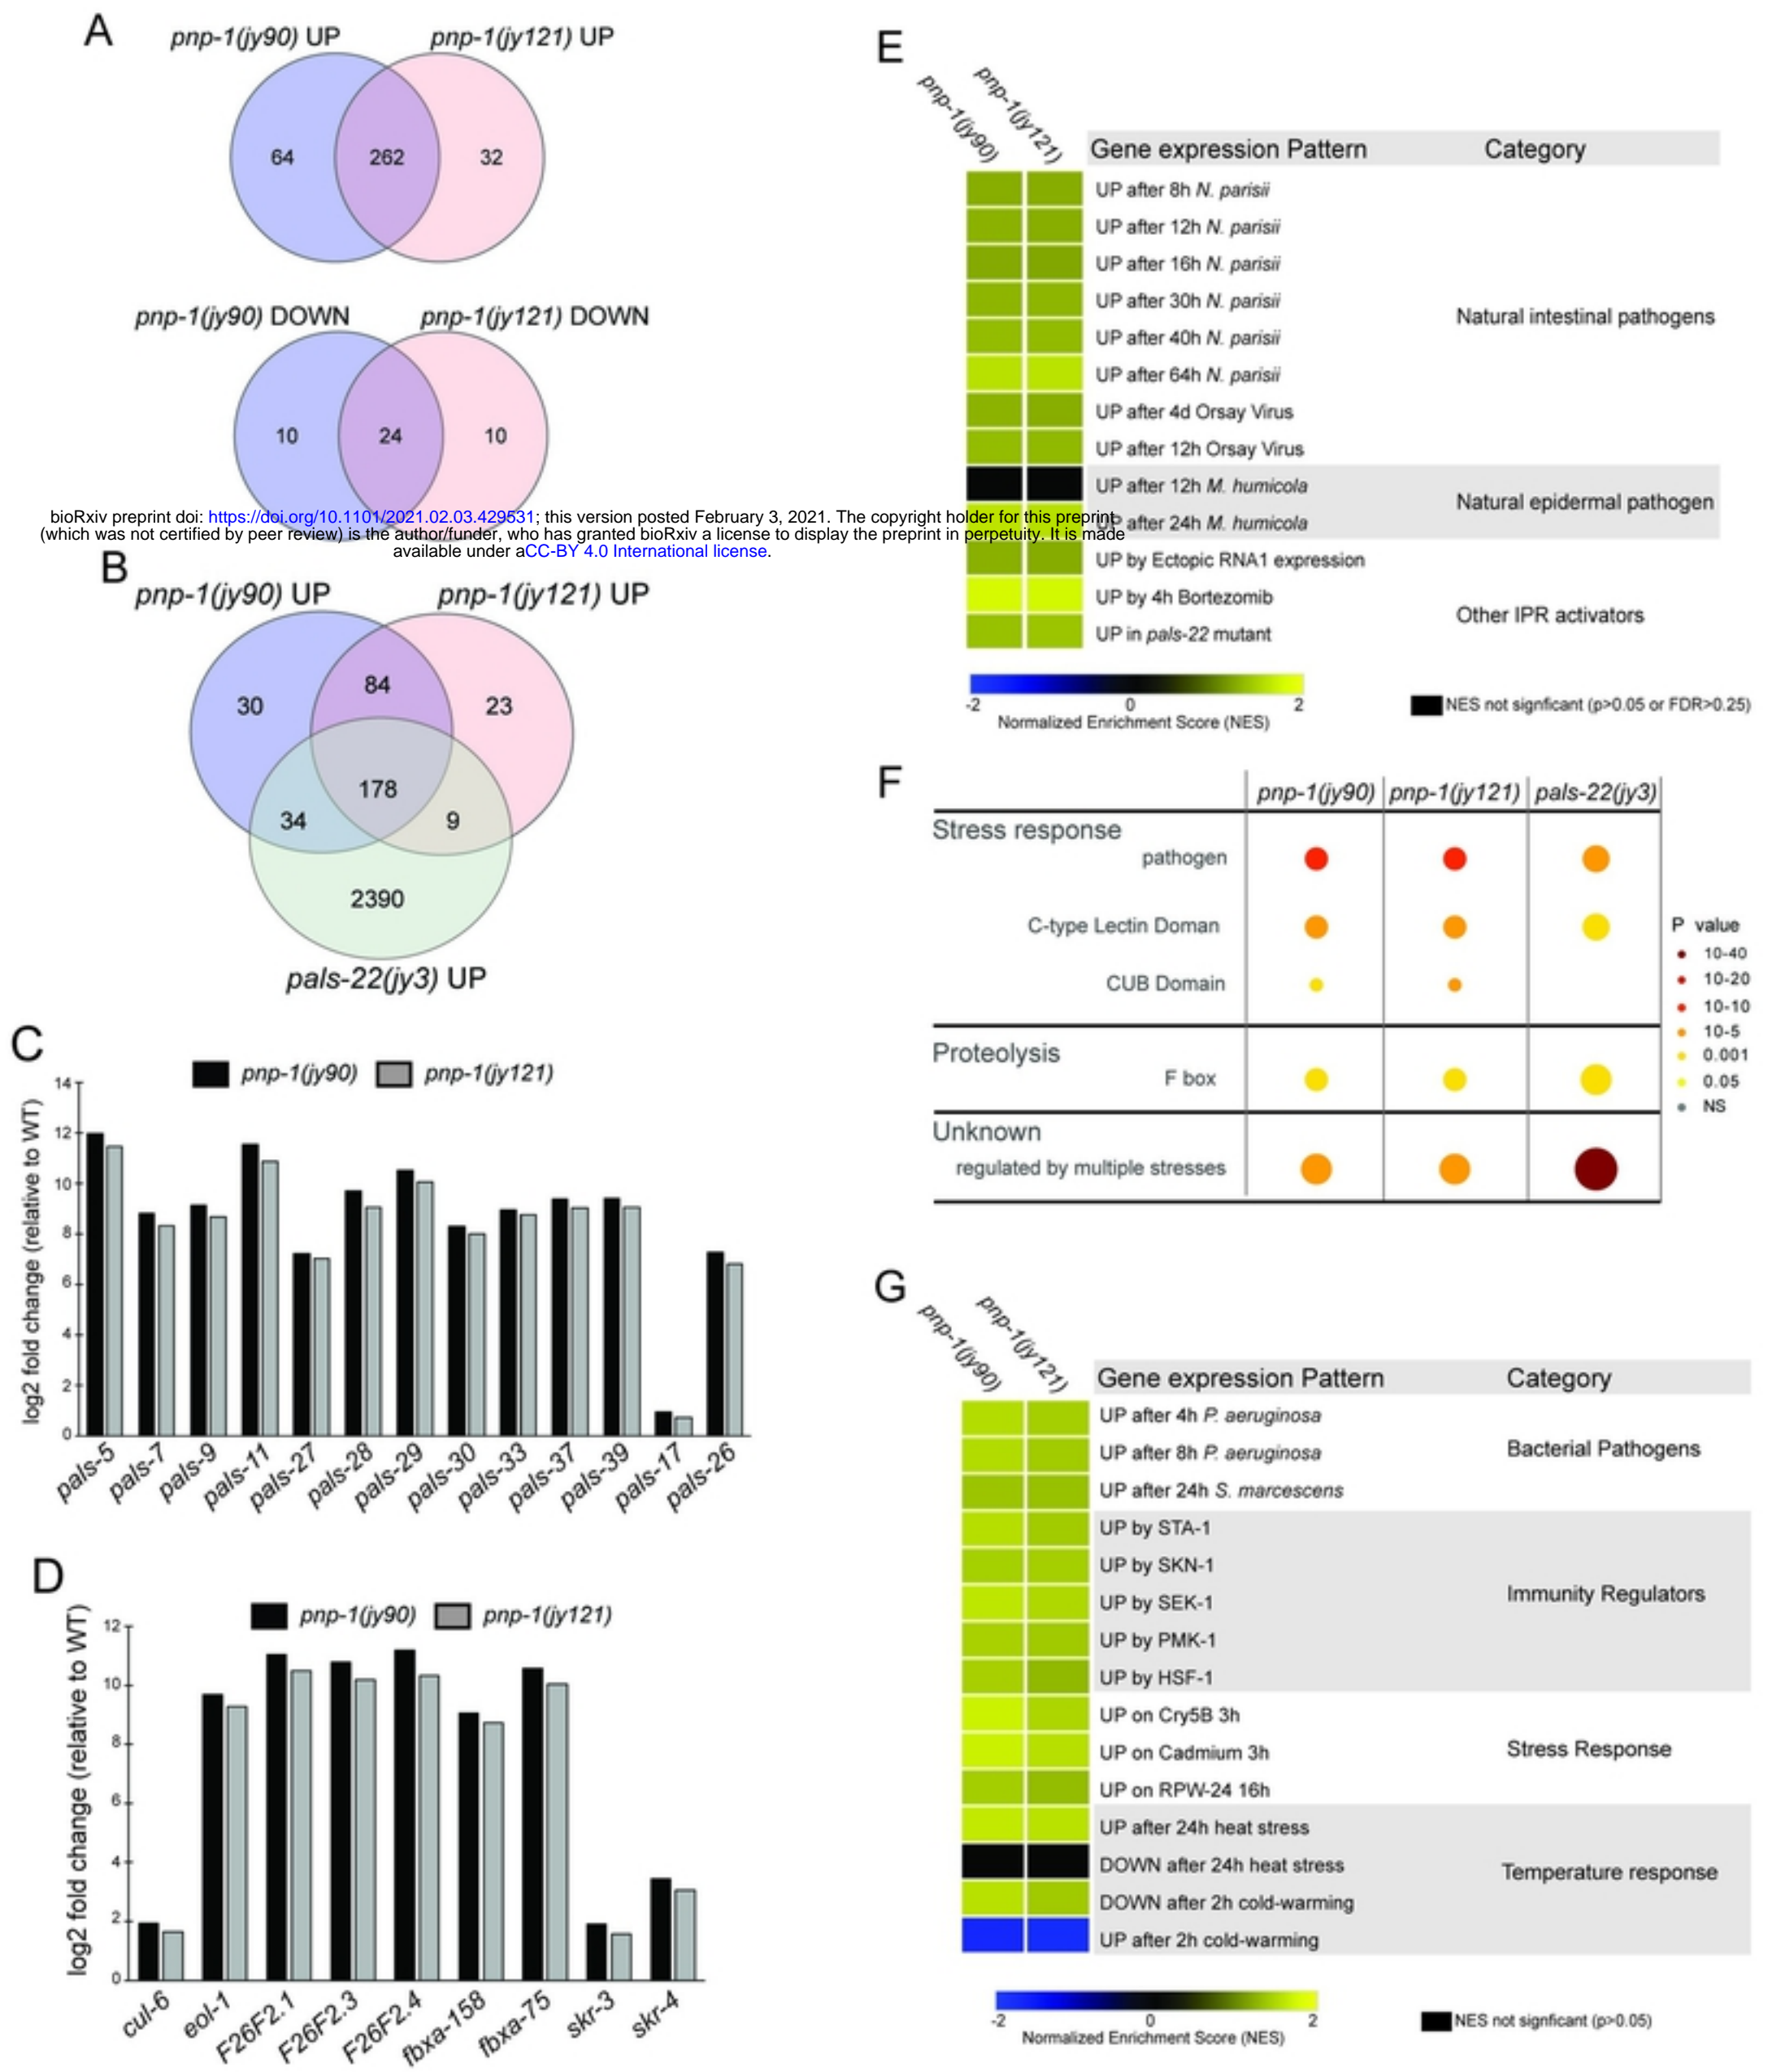

Fig 5

A bioRxiv preprint doi: <https://doi.org/10.1101/2021.02.03.429531>; this version posted February 3, 2021. The copyright holder for this preprint (which was not certified by peer review) is the author/funder, who has granted bioRxiv a license to display the preprint in perpetuity. It is made available under aCC-BY 4.0 International license.

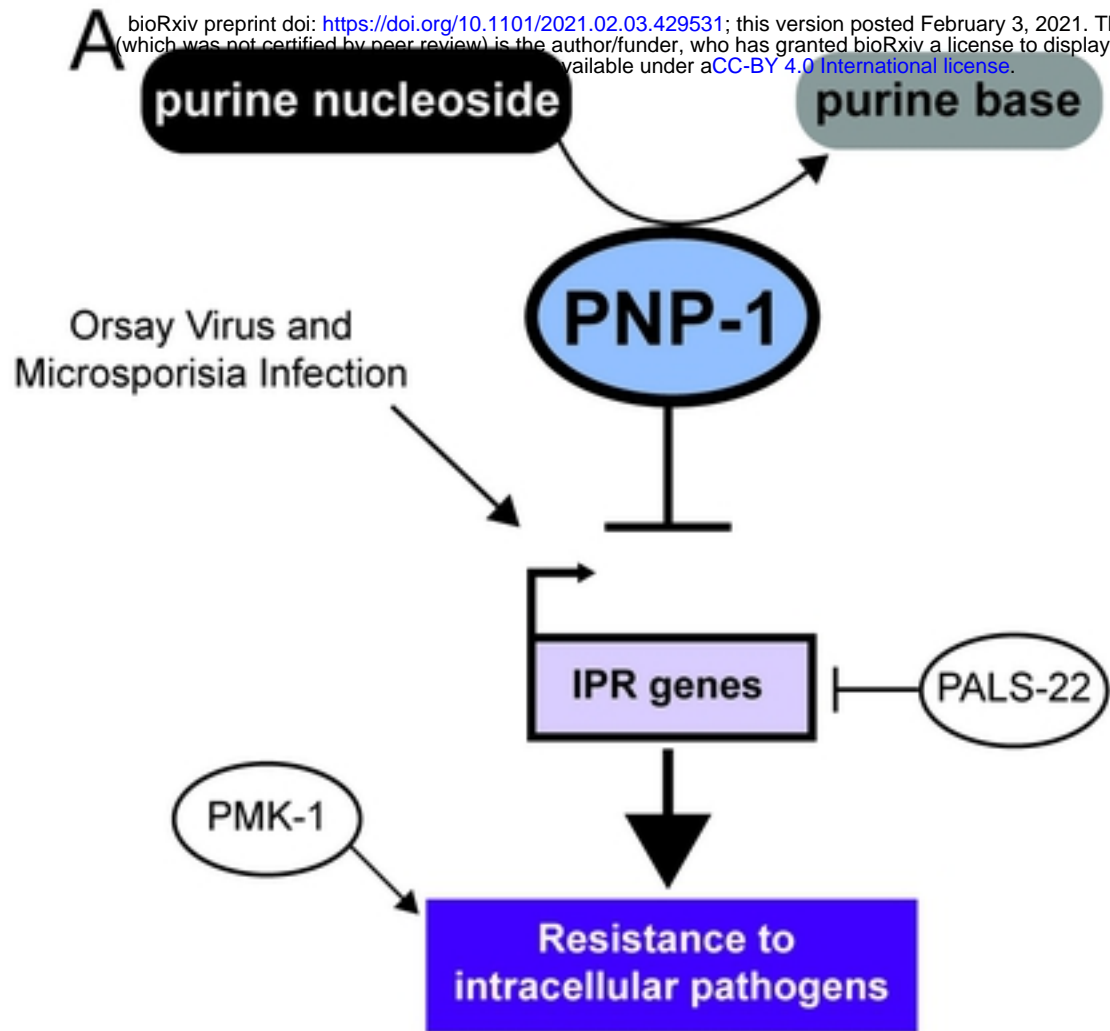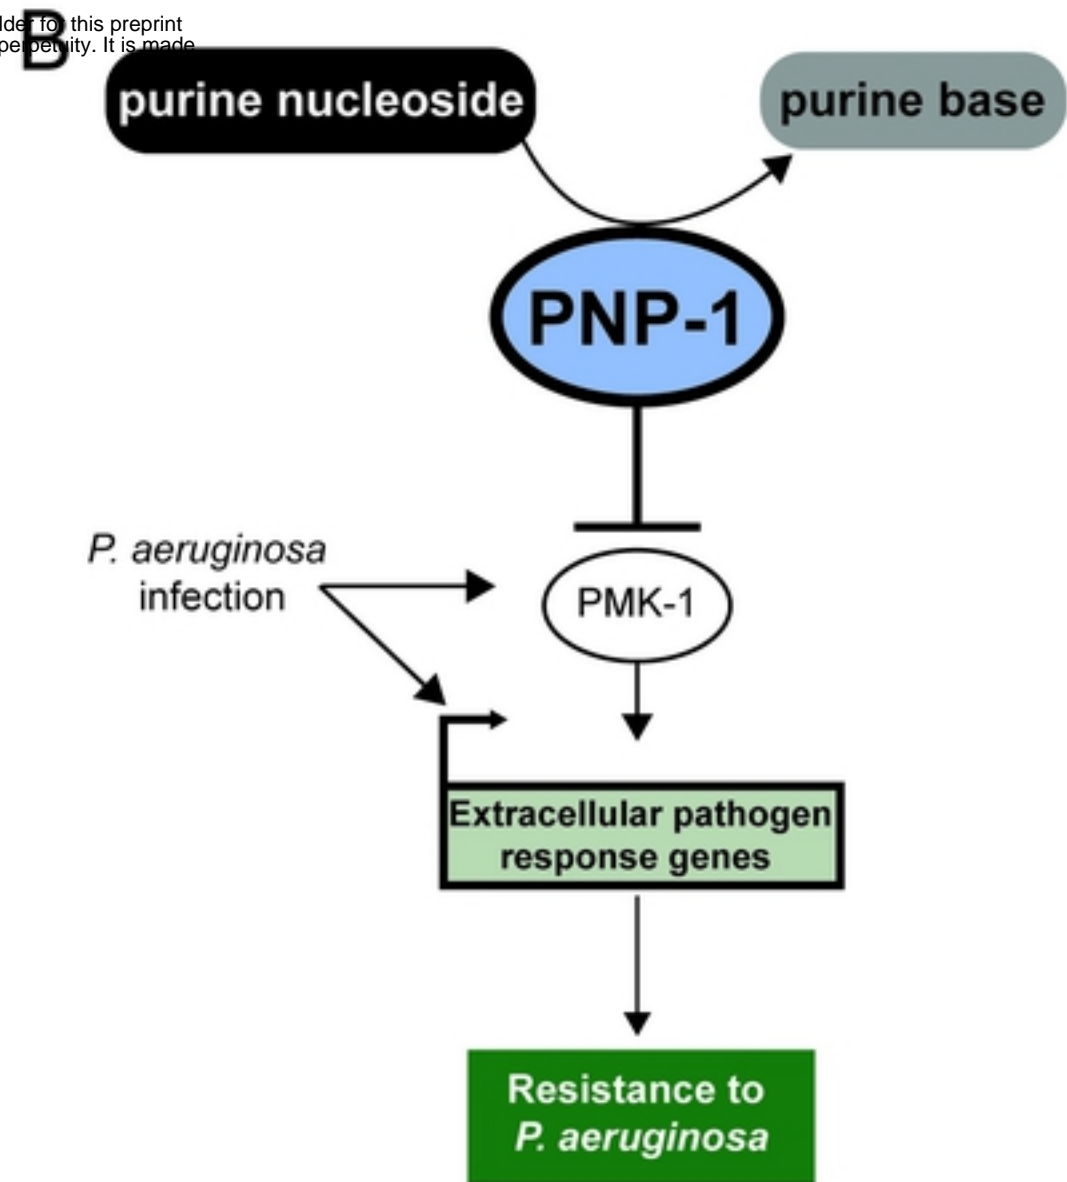

Fig 6



PNP-1a 1 -----  
 PNP-1b 1 -----M  
 DmPNP 1 MTGYKVANGNGHSNGNGNTKGTNGTNGHSNGHKSADYTAQENPTMCSRDCSSGPGGSNRG  
 MsPNP 1 -----  
 HsPNP 1 -----

PNP-1a 1 -----M---ENNNSPTNAAEH-----NQKIDPRNYDDVLSV  
 PNP-1b 2 GNCTQKLTTS-----TSLSPAM---ENNNSPTNAAEH-----NQKIDPRNYDDVLSV  
 DmPNP 61 NTCSDKKGAKAGSLTGEKI IPTPQSLLGNGKIQCELTHEELRALRVLNEDTYPYEVIEEI  
 MsPNP 1 -----MENEFTYEDYETT  
 HsPNP 1 -----MENGYTYEDYKNT

bioRxiv preprint doi: <https://doi.org/10.1101/2021.02.03.429531>; this version posted February 3, 2021. The copyright holder for this preprint (which was not certified by peer review) is the author/funder, who has granted bioRxiv a license to display the preprint in perpetuity. It is made available under aCC-BY 4.0 International license.

\* jy90

PNP-1a 29 AASIREQVGEDVARADLGI ICGSGLGPIGDTVQDATILPYSKIPGFPPTHVVGHKGNMIF  
 PNP-1b 46 AASIREQVGEDVARADLGI ICGSGLGPIGDTVQDATILPYSKIPGFPPTHVVGHKGNMIF  
 DmPNP 121 ADFI---TKGSGMRPKIGI ICGSGLGSLADMIQDPKIFEYEKIPNFPVSTVEGHAGRLV  
 MsPNP 14 AKWL---LQHTEYRPQVAVICGSGLGGLTAHLKEAQIFDYNEIPNFPQSTVQGHAGRLV  
 HsPNP 14 AEWL---LSHTKHRPQVAI ICGSGLGGLTDKLTQAQIFDYGEIPNFPQRSTVPGHAGRLV

PNP-1a 89 GKLGKGVVCLQGRFHPYEHNMDLALCTLPVRVMHQLGKIMIVSNAAGGINAVLRHGDL  
 PNP-1b 106 GKLGKGVVCLQGRFHPYEHNMDLALCTLPVRVMHQLGKIMIVSNAAGGINAVLRHGDL  
 DmPNP 178 GTLEGATVMAMQGRFHFYEG-YPLAKCSMPVRVMKLCGVEYLFATNAAGGINPRFAVGDI  
 MsPNP 71 GLLNGRCCVMMQGRFHMYEG-YSLSKVTFPVRVFHLLGVETLVVTNAAGGLNPNFEVVDI  
 HsPNP 71 GFLNGRACVMMQGRFHMYEG-YPLWKVTFPVRVFHLLGVDTLVVTNAAGGLNPKFEVVDI

PNP-1a 149 MLIKDHIFLPALAGFSPLVGCNDPRFGARFVSVHDAYDKQLRQLAIDVGRR--SDMTLYE  
 PNP-1b 166 MLIKDHIFLPALAGFSPLVGCNDPRFGARFVSVHDAYDKQLRQLAIDVGRR--SDMTLYE  
 DmPNP 237 MLMHDHVNMLGFAGNSPLOGPNDPRFGPRFPALVNSYNKDLINKAIEIAKAMGIESNIHV  
 MsPNP 130 MLIRDHINLPGFCGQNPLRGPNDERFGVRFPAUSDAYDRDMRQKAF TAWKQMGEORELQE  
 HsPNP 130 MLIRDHINLPGFSGQNPLRGPNDERFGDRFPAMSDAYDR TMRQRALSTWKQMGEORELQE

PNP-1a 207 GYVMSGGPQYESPAEVSLFKTVGADALGMSTCHEVTVARQCGIKVLGFSLITNIANLDA  
 PNP-1b 224 GYVMSGGPQYESPAEVSLFKTVGADALGMSTCHEVTVARQCGIKVLGFSLITNIANLDA  
 DmPNP 297 GYVMSGGPQYESPAEVSLFKTVGADALGMSTCHEVTVARQCGIKVLGFSLITNIANLDA  
 MsPNP 190 GTYVMLAGPNFETVAESRLKMLGADAVGMSTVPEVIVARHCGLRVFGFSLITNKVMDY  
 HsPNP 190 GTYVMVAGPSFETVAECRVLQKLGADAVGMSTVPEVIVARHCGLRVFGFSLITNKVIMDY

PNP-1a 267 DAS--VEVSHEEVMDIAQQAGERASRFVSDIITEITL-----  
 PNP-1b 284 DAS--VEVSHEEVMDIAQQAGERASRFVSDIITEITL-----  
 DmPNP 357 SDKKDDEANHDEVMAVAKNRQKACCELVSR LIREIHLASA--  
 MsPNP 250 ENL--EKANHEEVLDAGKAAAQTLERFVSILMESIPLPDRGS  
 HsPNP 250 ESL--EKANHEEVLAAGKQAAQKLEQFVSILMASIPLPDKAS

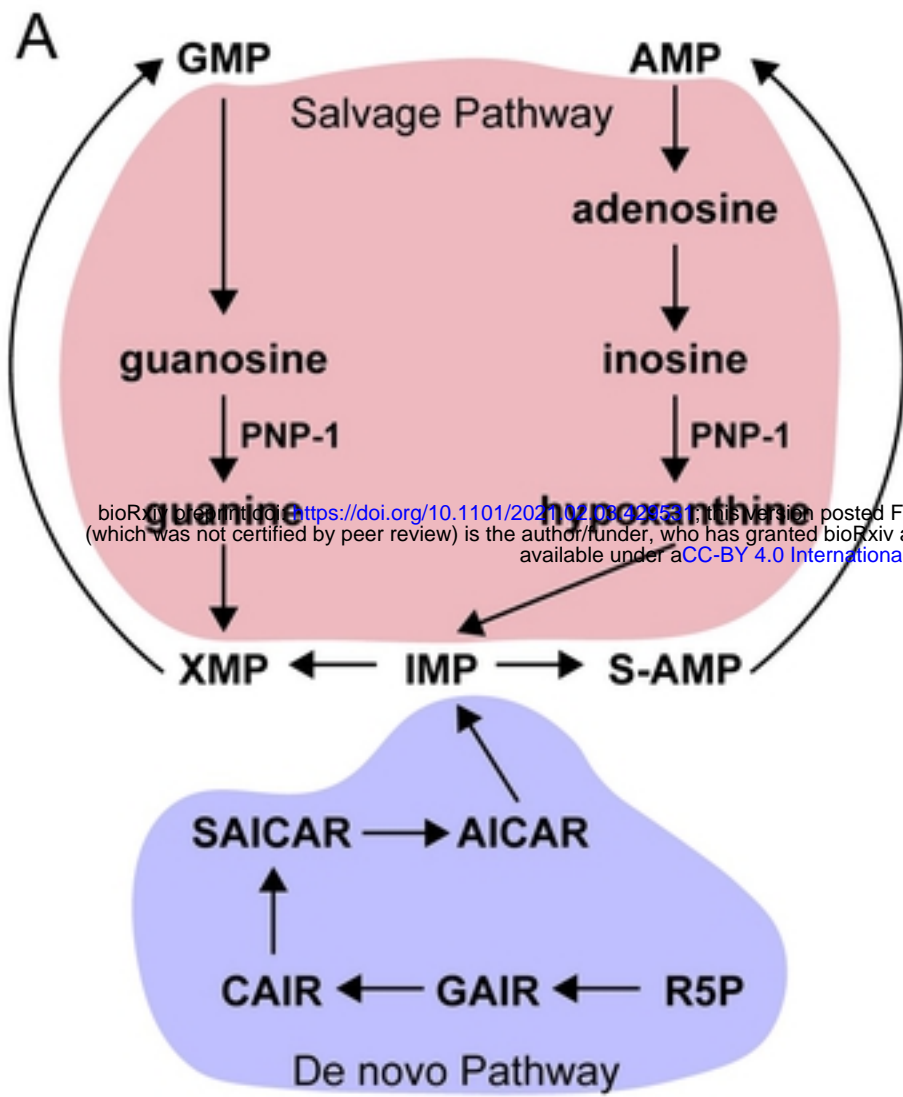

bioRxiv preprint doi: <https://doi.org/10.1101/2021.02.03.424511>; this version posted February 3, 2021. The copyright holder for this preprint (which was not certified by peer review) is the author/funder, who has granted bioRxiv a license to display the preprint in perpetuity. It is made available under aCC-BY 4.0 International license.

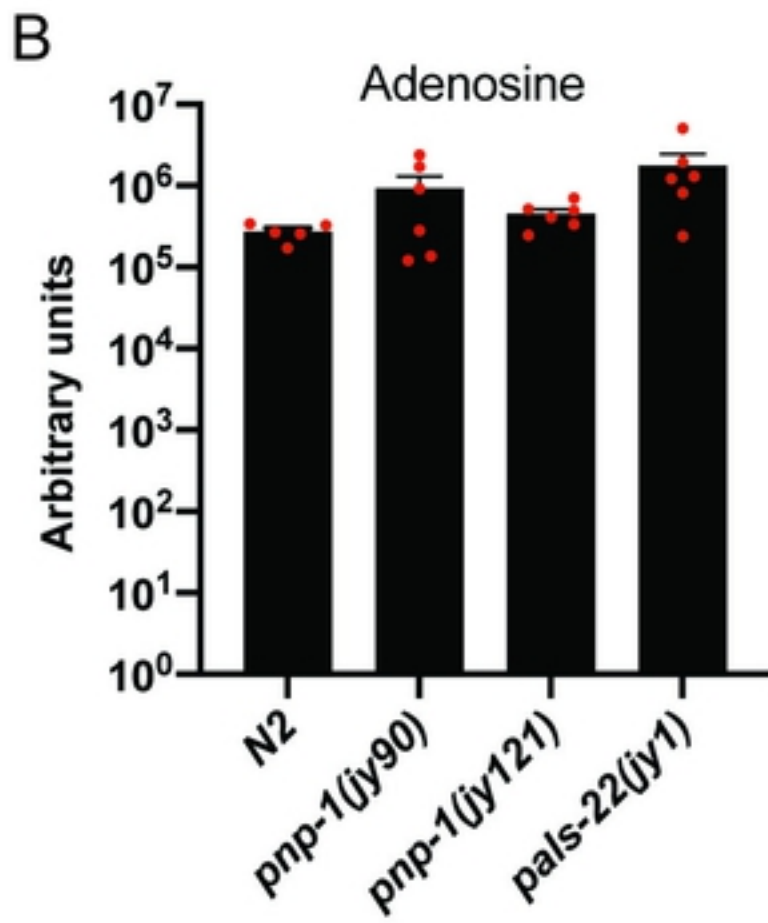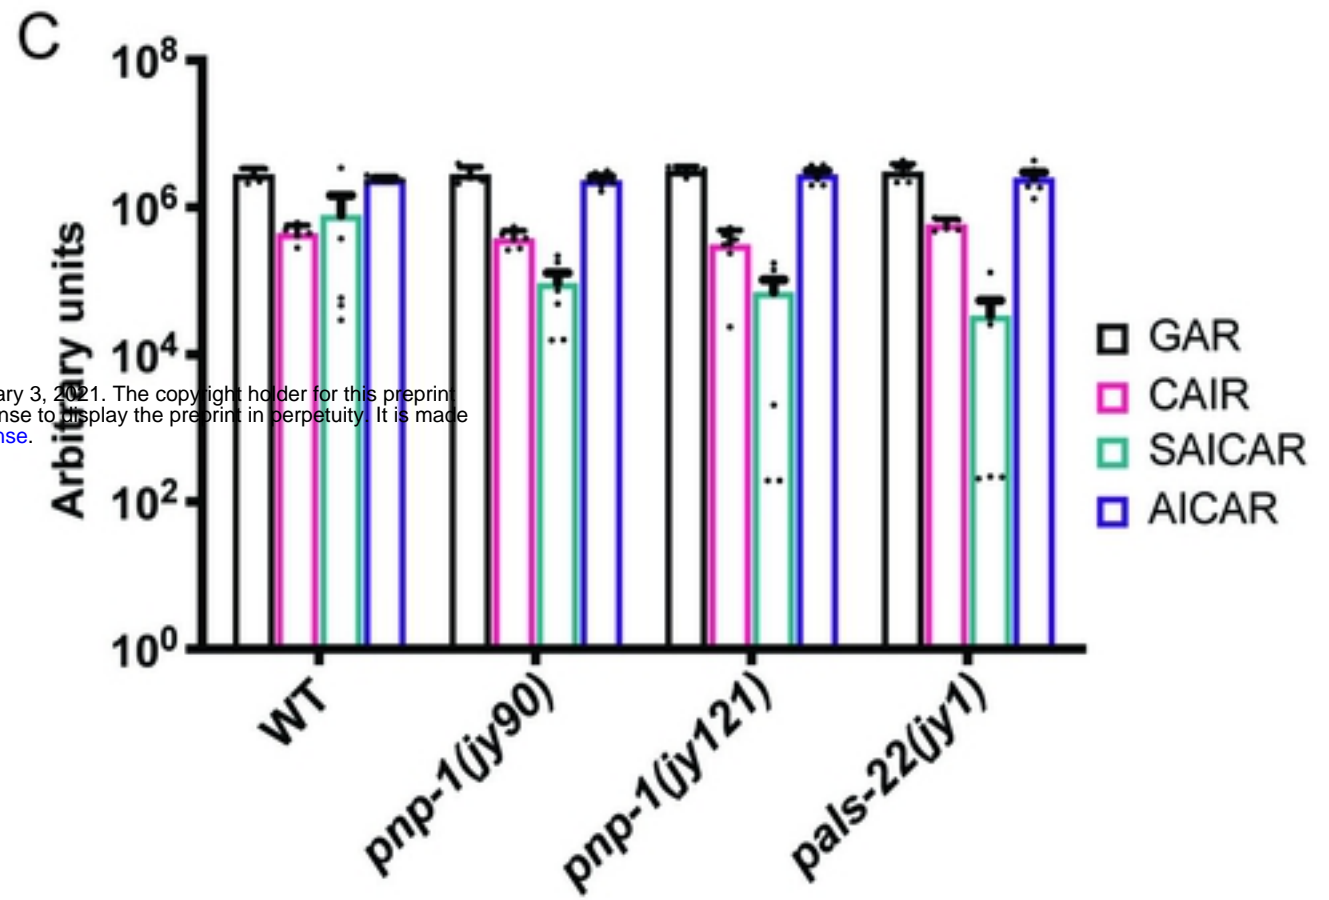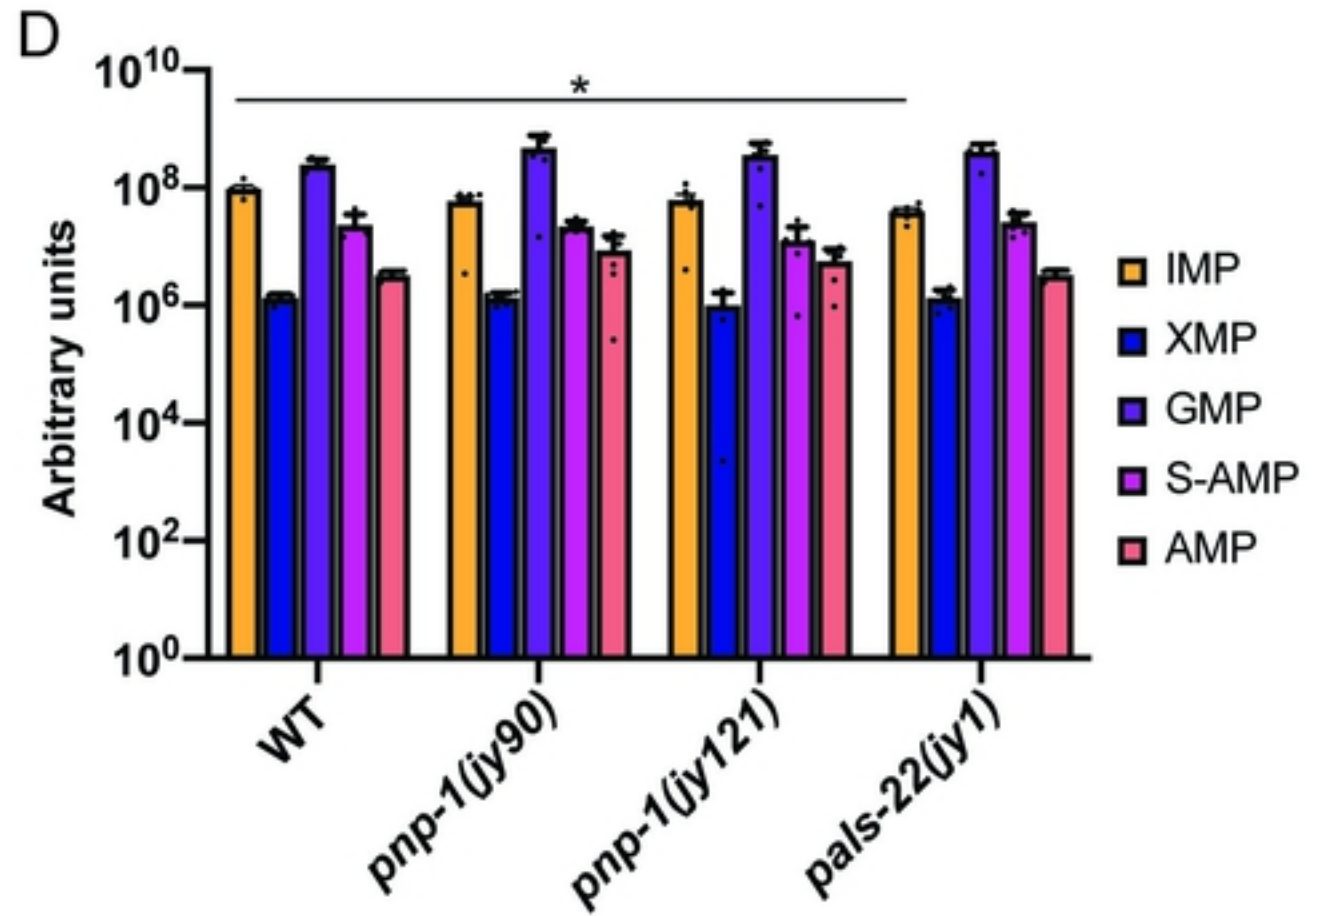

bioRxiv preprint doi: <https://doi.org/10.1101/2021.02.03.429531>; this version posted February 3, 2021. The copyright holder for this preprint (which was not certified by peer review) is the author/funder, who has granted bioRxiv a license to display the preprint in perpetuity. It is made available under aCC-BY 4.0 International license.

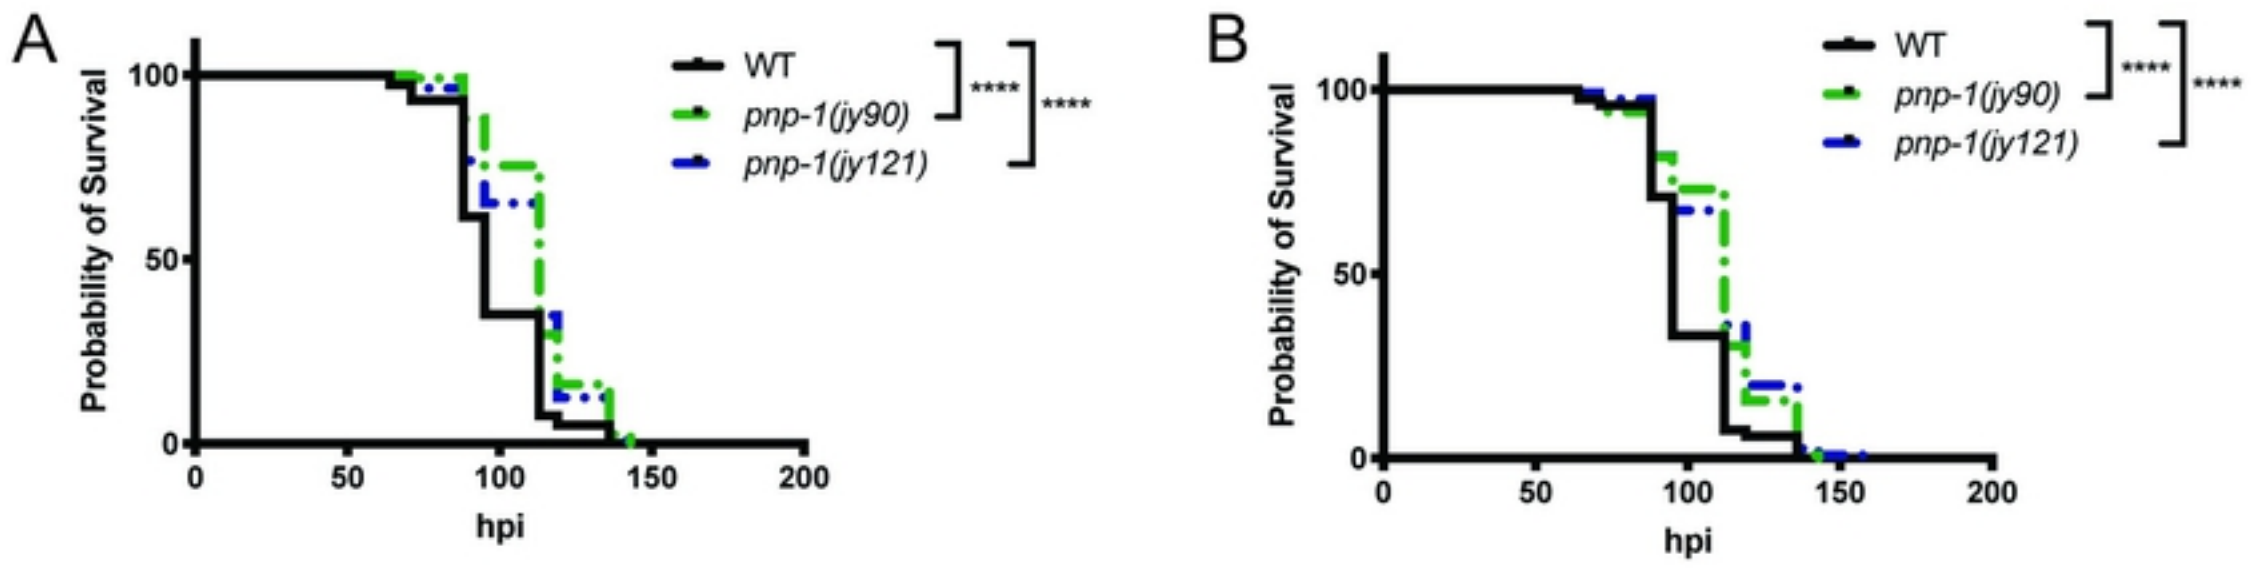



PNP-1::EGFP::3XFLAG

dil

Merge

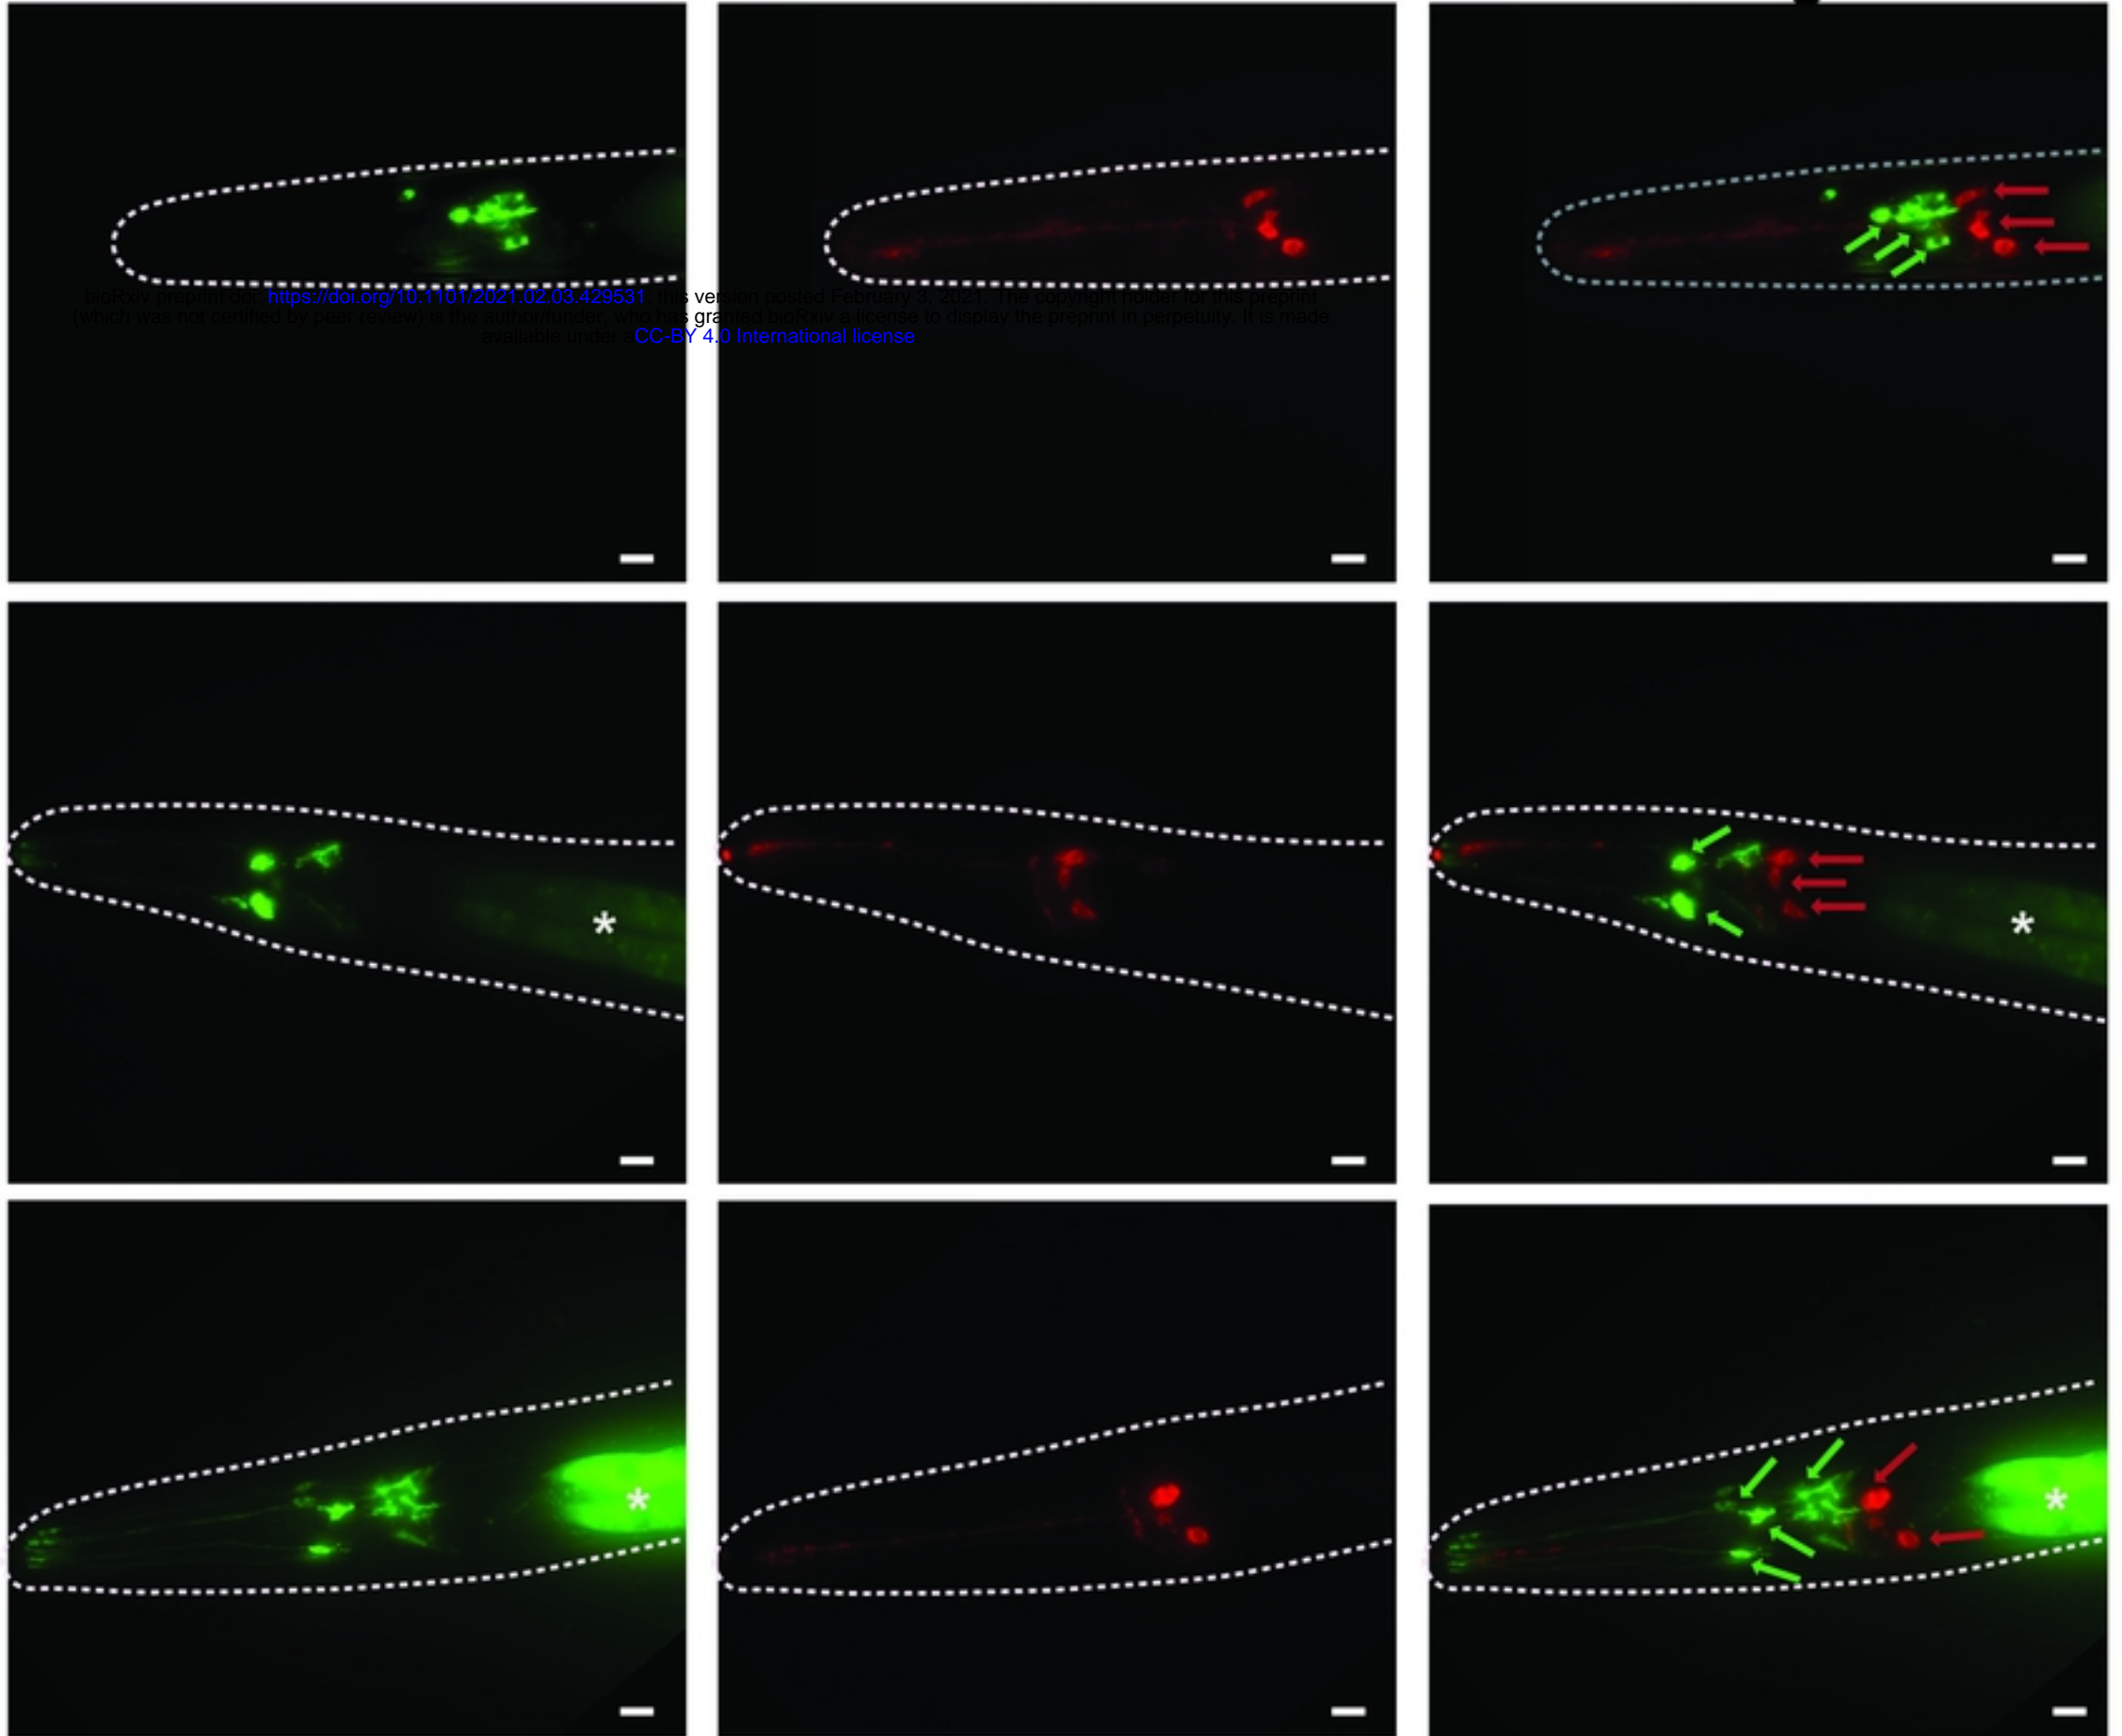

bioRxiv preprint doi: <https://doi.org/10.1101/2021.02.03.429531>; this version posted February 3, 2021. The copyright holder for this preprint (which was not certified by peer review) is the author/funder, who has granted bioRxiv a license to display the preprint in perpetuity. It is made available under aCC-BY 4.0 International license.

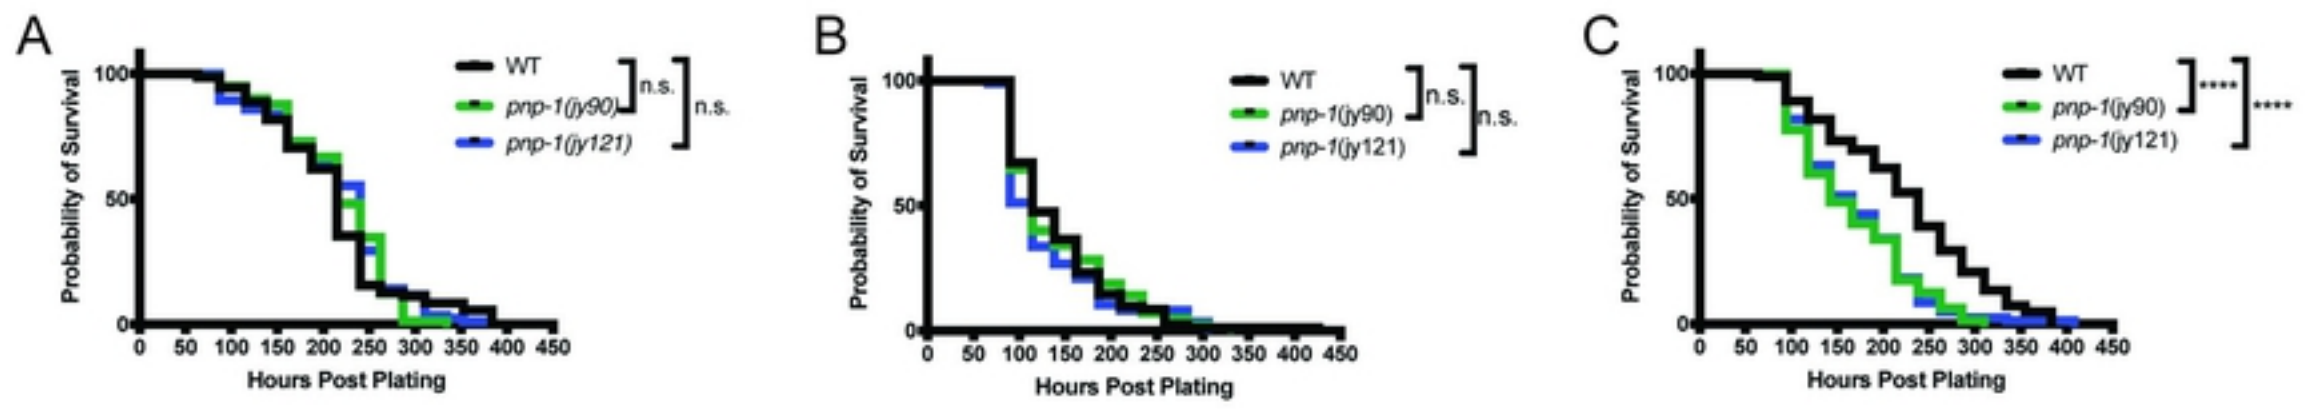

Source: https://www.biorxiv.org/content/10.1101/2021.02.03.429531v1.full.pdf
